# Supplementary material for: Electronic structure and magnetic properties of rhenium complexes with an iminoxolene ligand: experimental and computational studies
Source: Royal Society of Chemistry journal article supplement (doi:10.1039/d5dt02698a), 2026-01-01
Supplement: d5dt02698a1.pdf [file d5dt02698a1.pdf]

Electronic Supplementary Information

## **Electronic Structure and Magnetic Properties of Rhenium Complexes with Iminoxolene Ligand: Experimental and Computational Studies**

Pavel A. Petrov,<sup>†\*</sup> Alexey A. Dmitriev,<sup>‡\*</sup> Anastasiia D. Semikina,<sup>†</sup> Ilia V. Eltsov,<sup>†</sup>  
Taisiya S. Sukhikh,<sup>†</sup> Alexander N. Lavrov,<sup>†</sup> Artem L. Gushchin,<sup>†</sup> Maxim N. Sokolov,<sup>†</sup>  
and Nina P. Gritsan<sup>‡</sup>

<sup>†</sup> Nikolaev Institute of Inorganic Chemistry SB RAS, Prosp. Lavrentieva 3, 630090  
Novosibirsk, Russia;

<sup>‡</sup> Voevodsky Institute of Chemical Kinetics and Combustion SB RAS, Institutskaya 3,  
630090 Novosibirsk, Russia;

<sup>†</sup> Novosibirsk State University, Pirogova 2, 630090 Novosibirsk, Russia.

## I. Crystal structures

**Table S1. Crystal data and structure refinement for structures 1, 2, 2·4C<sub>6</sub>H<sub>6</sub>, and 3·0.5C<sub>4</sub>H<sub>8</sub>O.**

|                                                              | <b>1</b>                                                           | <b>2</b>                                                            | <b>2·4C<sub>6</sub>H<sub>6</sub></b>                                | <b>3·0.5C<sub>4</sub>H<sub>8</sub>O</b>                                |
|--------------------------------------------------------------|--------------------------------------------------------------------|---------------------------------------------------------------------|---------------------------------------------------------------------|------------------------------------------------------------------------|
| Empirical formula                                            | C <sub>44</sub> H <sub>52</sub> Cl <sub>3</sub> NOPRe              | C <sub>44</sub> H <sub>52</sub> Cl <sub>3</sub> NO <sub>2</sub> PRe | C <sub>68</sub> H <sub>76</sub> Cl <sub>3</sub> NO <sub>2</sub> PRe | C <sub>38</sub> H <sub>51</sub> Cl <sub>4</sub> CoNO <sub>1.5</sub> Re |
| Formula weight                                               | 934.38                                                             | 950.38                                                              | 1262.81                                                             | 932.72                                                                 |
| Temperature/K                                                | 150(2)                                                             | 150(2)                                                              | 150(2)                                                              | 150(2)                                                                 |
| Crystal system                                               | triclinic                                                          | monoclinic                                                          | triclinic                                                           | monoclinic                                                             |
| Space group                                                  | <i>P</i> −1                                                        | <i>P</i> 2 <sub>1</sub> /c                                          | <i>P</i> −1                                                         | <i>C</i> 2/ <i>c</i>                                                   |
| <i>a</i> /Å                                                  | 11.4320(2)                                                         | 11.2614(3)                                                          | 11.5787(3)                                                          | 40.471(3)                                                              |
| <i>b</i> /Å                                                  | 13.6478(3)                                                         | 13.6220(3)                                                          | 11.9253(3)                                                          | 10.0512(6)                                                             |
| <i>c</i> /Å                                                  | 13.7555(3)                                                         | 27.5513(9)                                                          | 23.4028(6)                                                          | 19.8546(14)                                                            |
| $\alpha$ /°                                                  | 99.2850(10)                                                        | 90                                                                  | 79.9600(10)                                                         | 90                                                                     |
| $\beta$ /°                                                   | 93.4870(10)                                                        | 95.8020(10)                                                         | 83.9670(10)                                                         | 101.752(4)                                                             |
| $\gamma$ /°                                                  | 96.5410(10)                                                        | 90                                                                  | 79.2710(10)                                                         | 90                                                                     |
| Volume/Å <sup>3</sup>                                        | 2097.37(7)                                                         | 4204.8(2)                                                           | 3117.51(14)                                                         | 7907.2(9)                                                              |
| <i>Z</i>                                                     | 2                                                                  | 4                                                                   | 2                                                                   | 8                                                                      |
| $\rho_{\text{calc}}$ / g cm <sup>−3</sup>                    | 1.480                                                              | 1.501                                                               | 1.345                                                               | 1.567                                                                  |
| $\mu$ /mm <sup>−1</sup>                                      | 3.160                                                              | 3.155                                                               | 2.146                                                               | 11.902                                                                 |
| <i>F</i> (000)                                               | 944.0                                                              | 1920.0                                                              | 1296.0                                                              | 3744.0                                                                 |
| Crystal size/mm                                              | 0.11×0.1×0.1                                                       | 0.15×0.11×0.06                                                      | 0.12×0.12×0.09                                                      | 0.13×0.12×0.03                                                         |
| 2 $\Theta$ range for data collection/°                       | 4.414–61.136                                                       | 3.338–57.44                                                         | 4.6–57.412                                                          | 4.46–140.478                                                           |
| Index ranges                                                 | −16 ≤ <i>h</i> ≤ 16,                                               | −15 ≤ <i>h</i> ≤ 15,                                                | −14 ≤ <i>h</i> ≤ 15,                                                | −49 ≤ <i>h</i> ≤ 48,                                                   |
|                                                              | −19 ≤ <i>k</i> ≤ 19,                                               | −18 ≤ <i>k</i> ≤ 18,                                                | −16 ≤ <i>k</i> ≤ 16,                                                | −10 ≤ <i>k</i> ≤ 11,                                                   |
|                                                              | −19 ≤ <i>l</i> ≤ 19                                                | −37 ≤ <i>l</i> ≤ 36                                                 | −31 ≤ <i>l</i> ≤ 31                                                 | −12 ≤ <i>l</i> ≤ 23                                                    |
| Reflections collected                                        | 53346                                                              | 21029                                                               | 48882                                                               | 7203                                                                   |
| Independent reflections                                      | 12800                                                              | 10878                                                               | 15973                                                               | 7203                                                                   |
| <i>R</i> <sub>int</sub>                                      | 0.0423                                                             | 0.0344                                                              | 0.0365                                                              | 0.1077                                                                 |
| Data/restraints/parameters                                   | 12800/0/470                                                        | 10878/0/479                                                         | 15973/198/815                                                       | 7203/150/506                                                           |
| Goodness-of-fit on <i>F</i> <sup>2</sup>                     | 1.041                                                              | 1.059                                                               | 1.042                                                               | 1.079                                                                  |
| Final <i>R</i> indexes [ <i>I</i> ≥ 2 $\sigma$ ( <i>I</i> )] | <i>R</i> <sub>1</sub> = 0.0257,<br><i>wR</i> <sub>2</sub> = 0.0495 | <i>R</i> <sub>1</sub> = 0.0353,<br><i>wR</i> <sub>2</sub> = 0.0741  | <i>R</i> <sub>1</sub> = 0.0253,<br><i>wR</i> <sub>2</sub> = 0.0479  | <i>R</i> <sub>1</sub> = 0.0565,<br><i>wR</i> <sub>2</sub> = 0.1391     |
| Final <i>R</i> indexes [all data]                            | <i>R</i> <sub>1</sub> = 0.0298,<br><i>wR</i> <sub>2</sub> = 0.0519 | <i>R</i> <sub>1</sub> = 0.0496,<br><i>wR</i> <sub>2</sub> = 0.0778  | <i>R</i> <sub>1</sub> = 0.0309,<br><i>wR</i> <sub>2</sub> = 0.0495  | <i>R</i> <sub>1</sub> = 0.0614,<br><i>wR</i> <sub>2</sub> = 0.1426     |
| Largest diff. peak/hole / e Å <sup>−3</sup>                  | 1.22/−0.67                                                         | 1.28/−1.21                                                          | 0.43/−0.46                                                          | 2.06/−1.58                                                             |
| CCDC                                                         | 2340971                                                            | 2340969                                                             | 2340970                                                             | 2493258                                                                |

## II. NMR spectroscopy

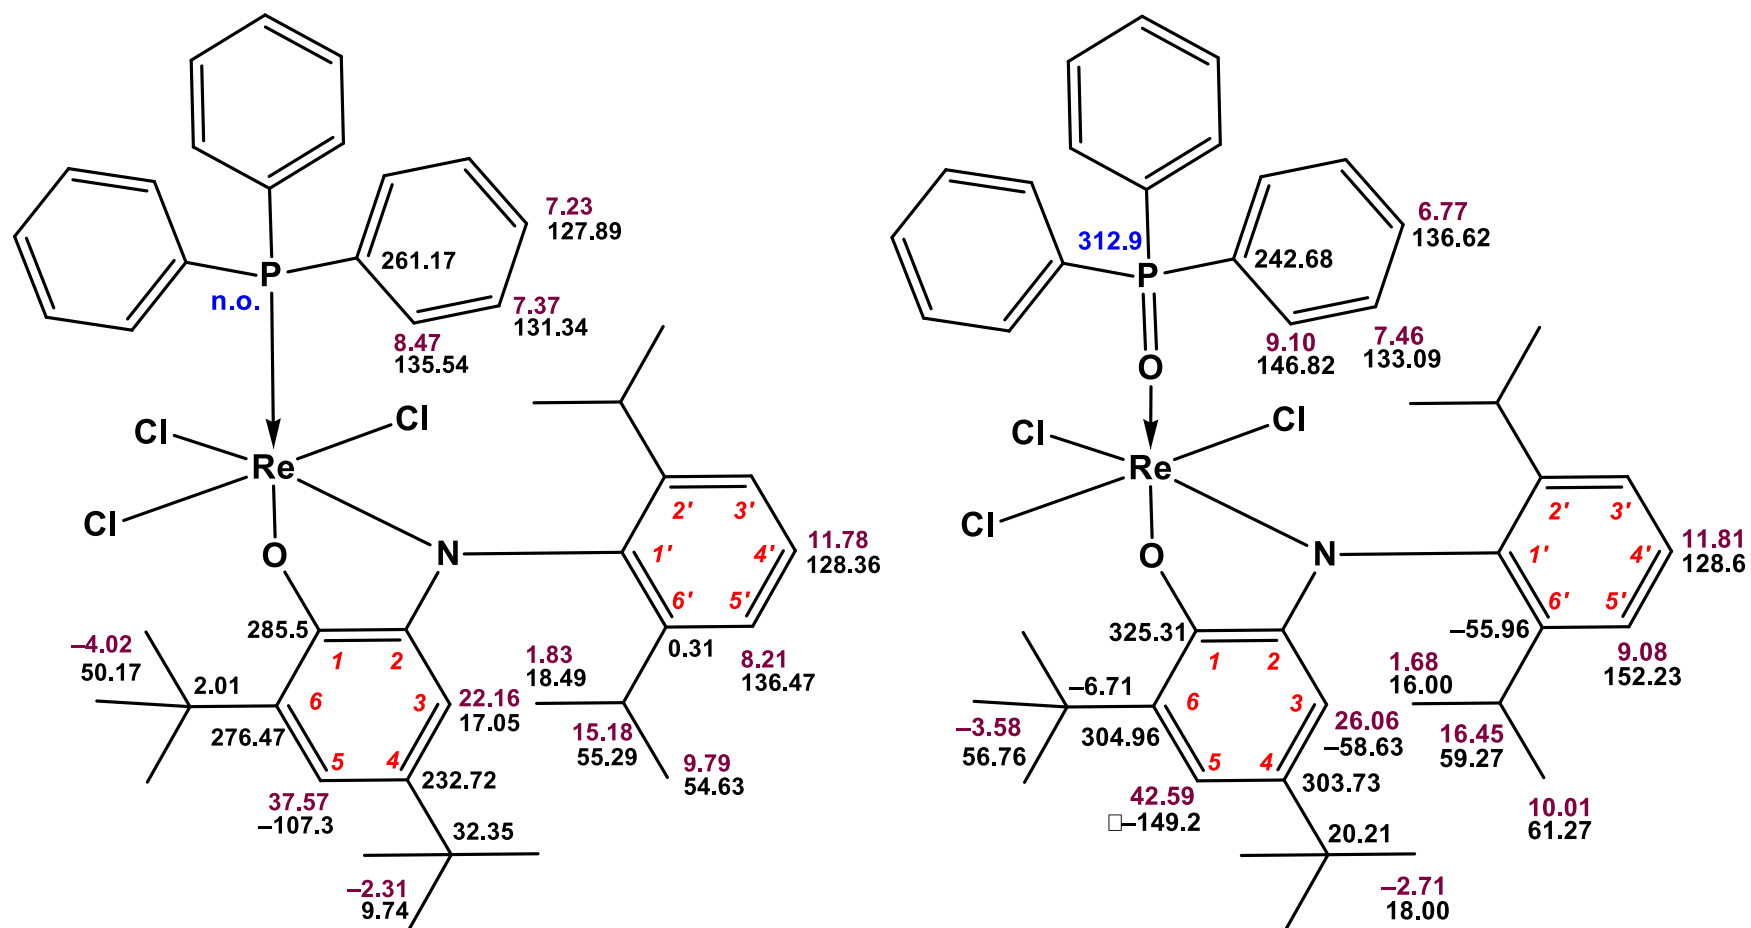

**Fig. S1.** Assignment scheme of  $^1\text{H}$  (magenta),  $^{13}\text{C}$  (black) and  $^{31}\text{P}$  (blue) chemical shifts for complexes **1** (top) and **2** (bottom) ( $\text{C}_6\text{D}_6$ , ambient temperature).

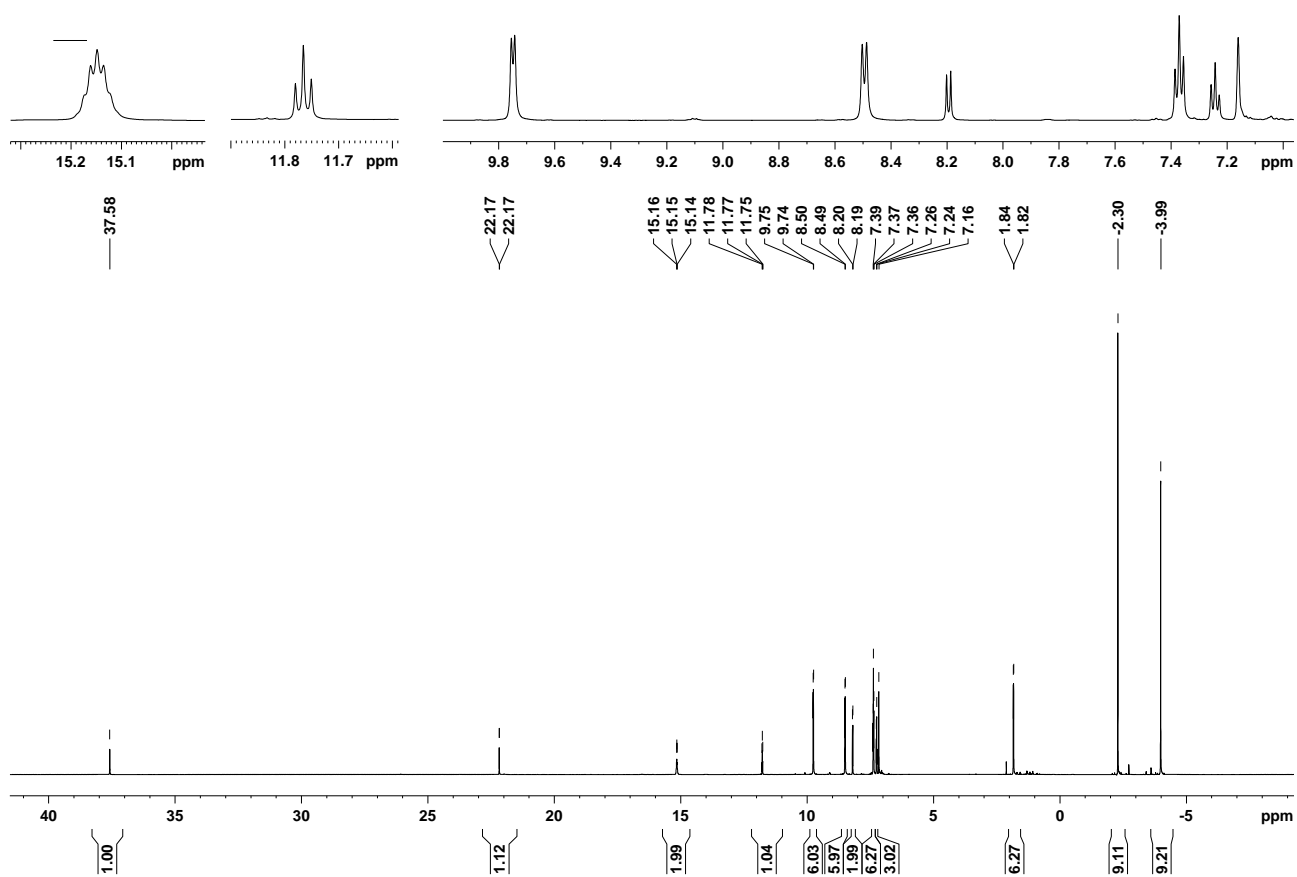

**Fig. S2.**  $^1\text{H}$  NMR spectrum of complex **1** ( $\text{C}_6\text{D}_6$ , ambient temperature).

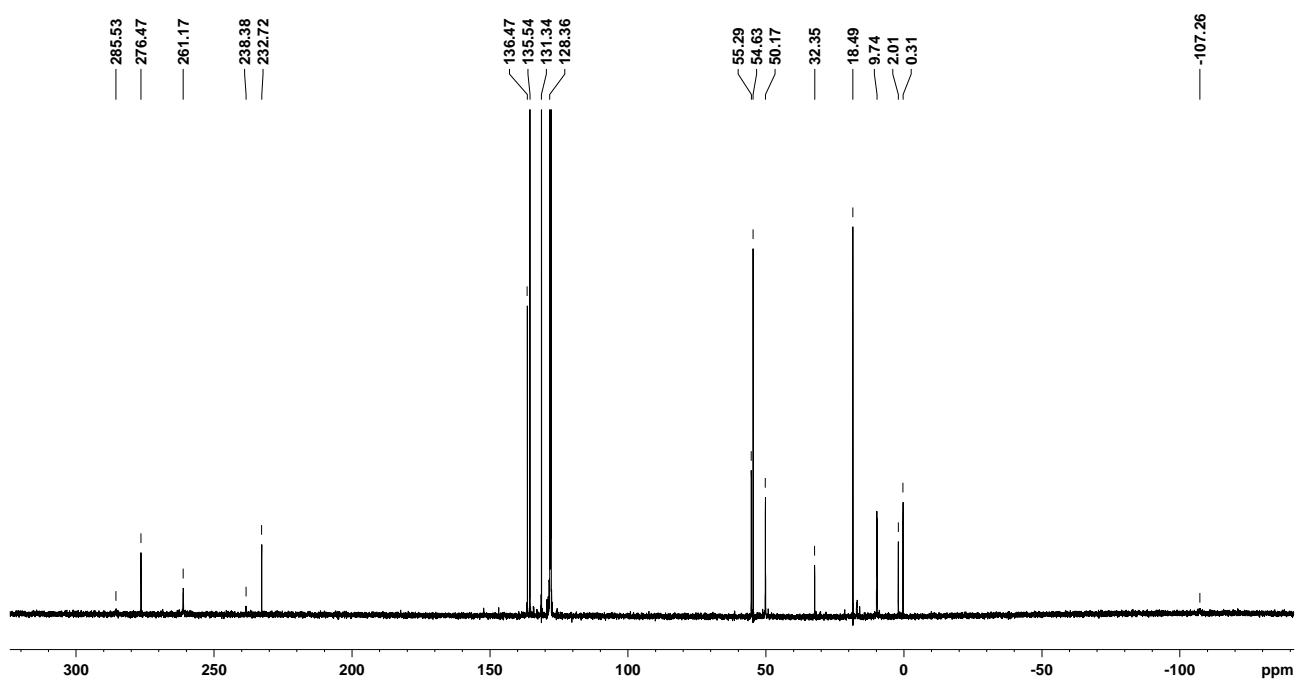

**Fig. S3.**  $^{13}\text{C}\{^1\text{H}\}$  NMR spectrum of complex **1** ( $\text{C}_6\text{D}_6$ , ambient temperature).

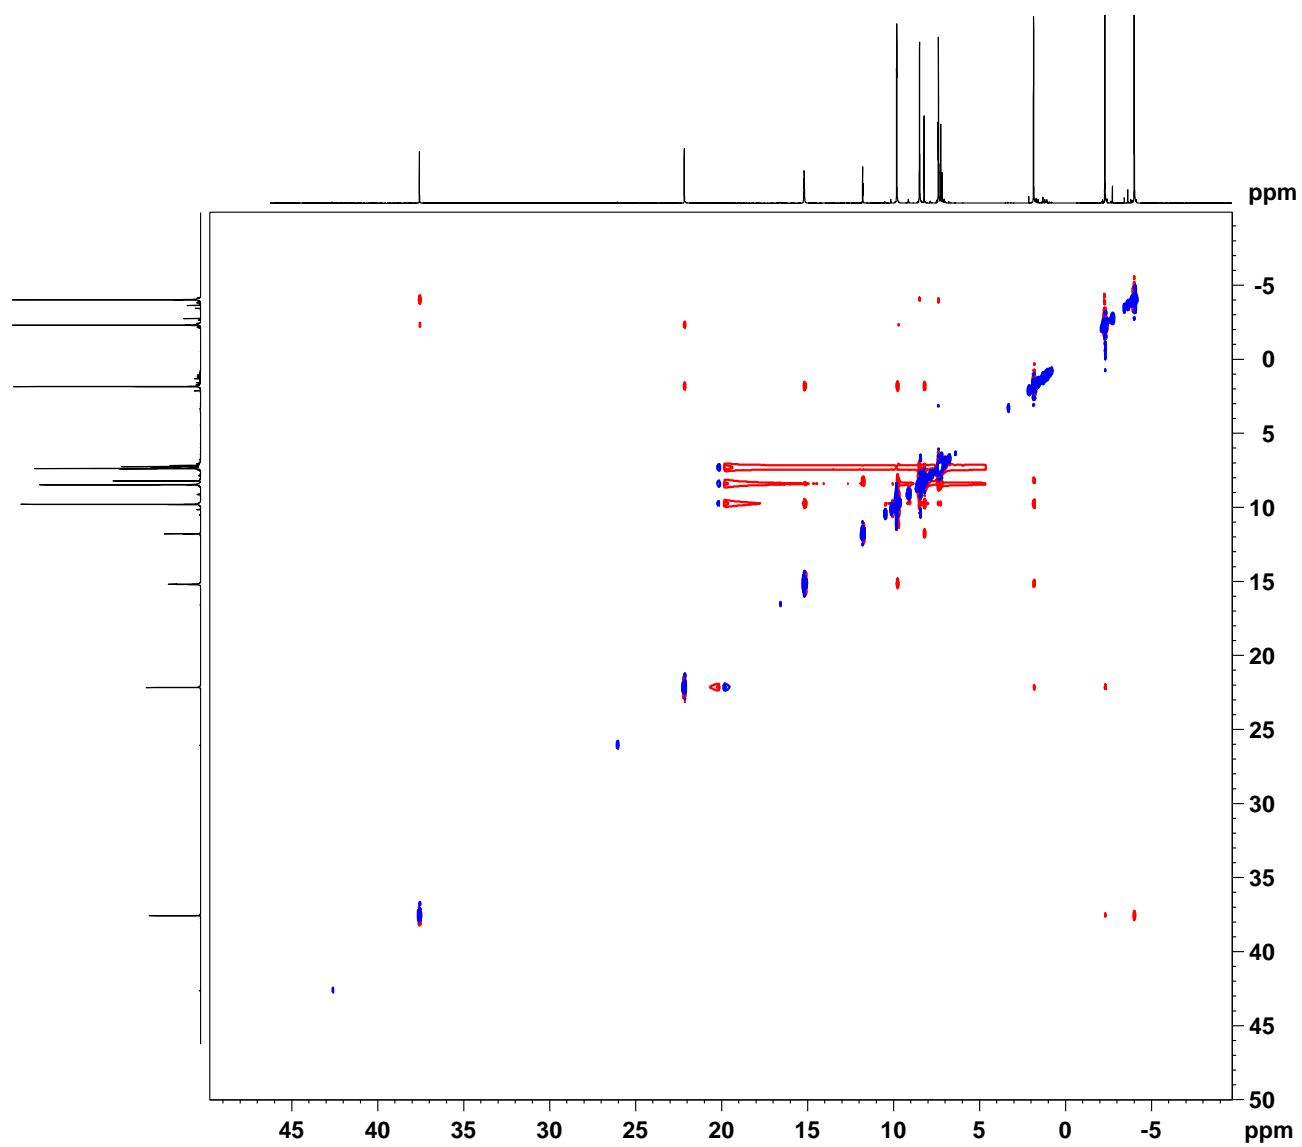

**Fig. S4.**  $^1\text{H}$ - $^1\text{H}$  NOESY NMR spectrum of complex **1** ( $\text{C}_6\text{D}_6$ , ambient temperature).

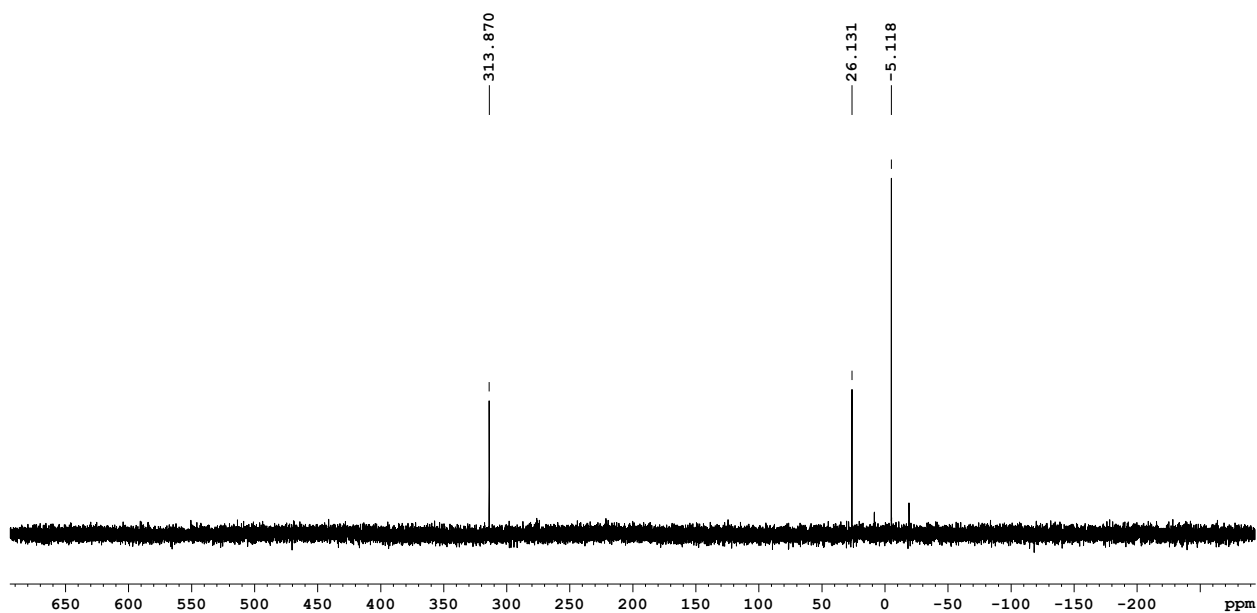

**Fig. S5.** <sup>31</sup>P NMR spectrum of complex **1** (C<sub>6</sub>D<sub>6</sub>, ambient temperature).

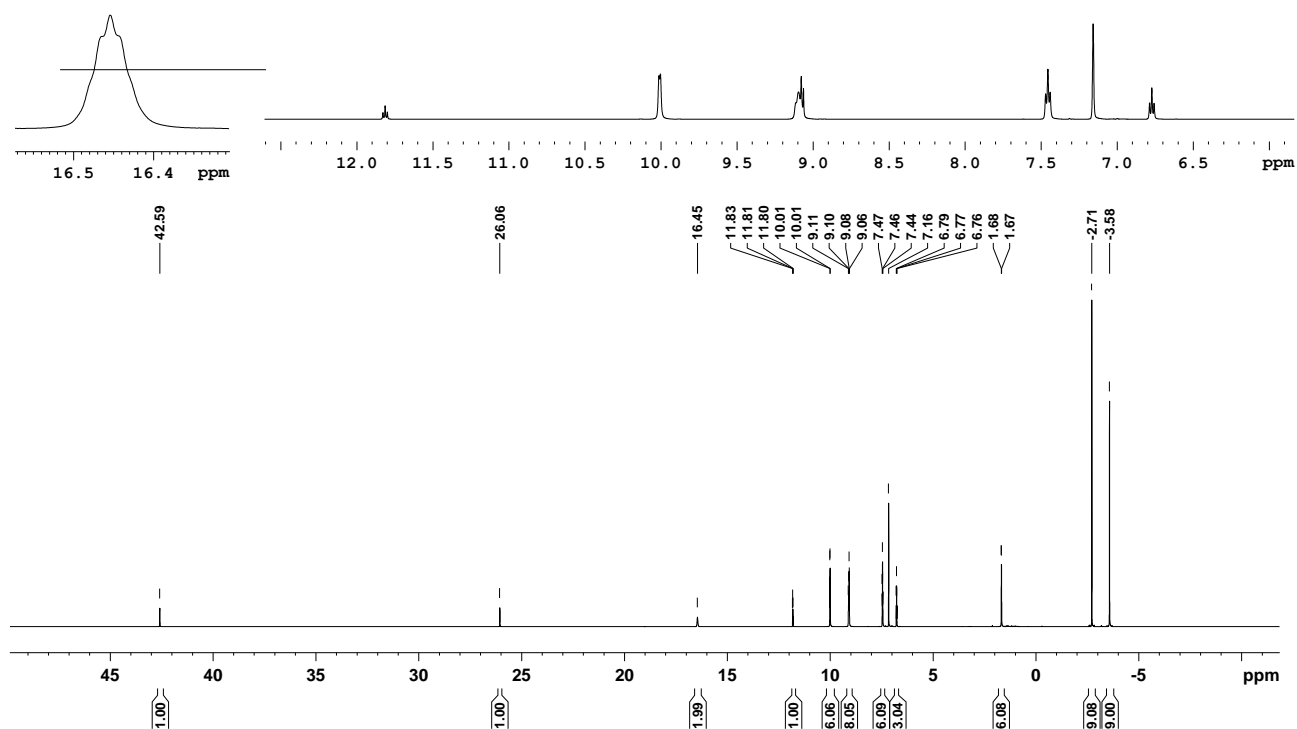

**Fig. S6.** <sup>1</sup>H NMR spectrum of complex **2** (C<sub>6</sub>D<sub>6</sub>, ambient temperature).

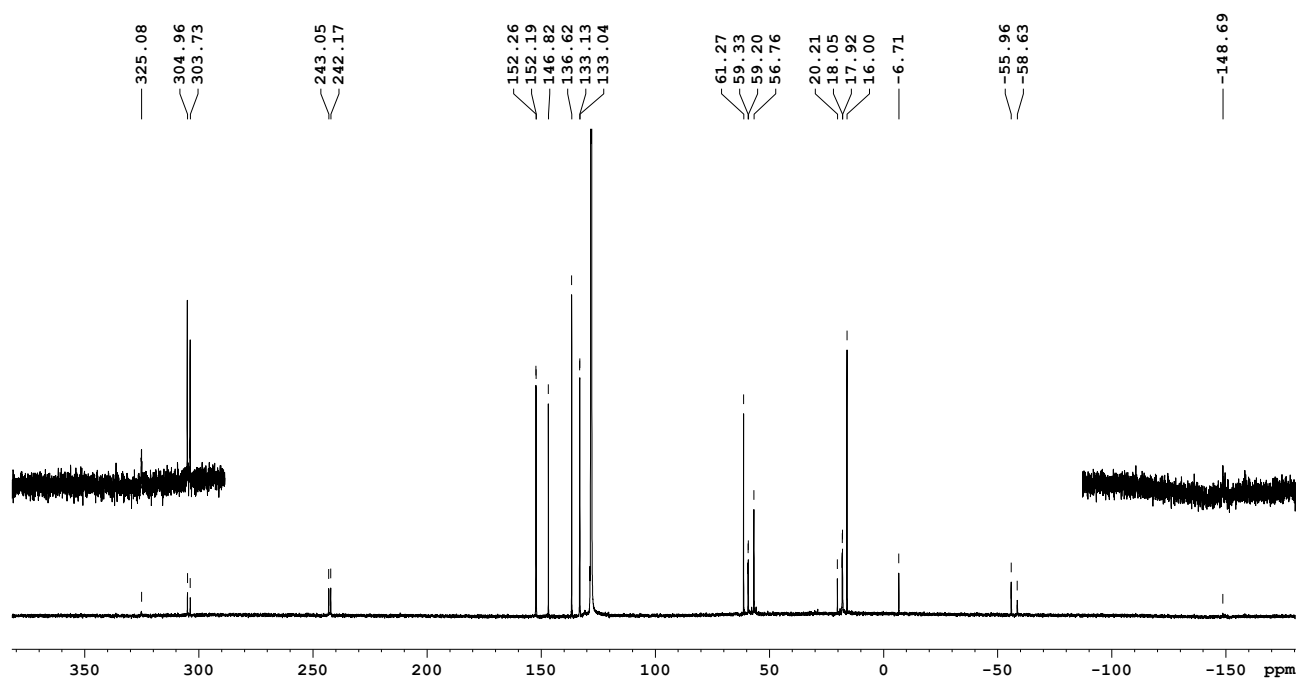

**Fig. S7.**  $^{13}\text{C}\{^1\text{H}\}$  NMR spectrum of complex **2** ( $\text{C}_6\text{D}_6$ , ambient temperature).

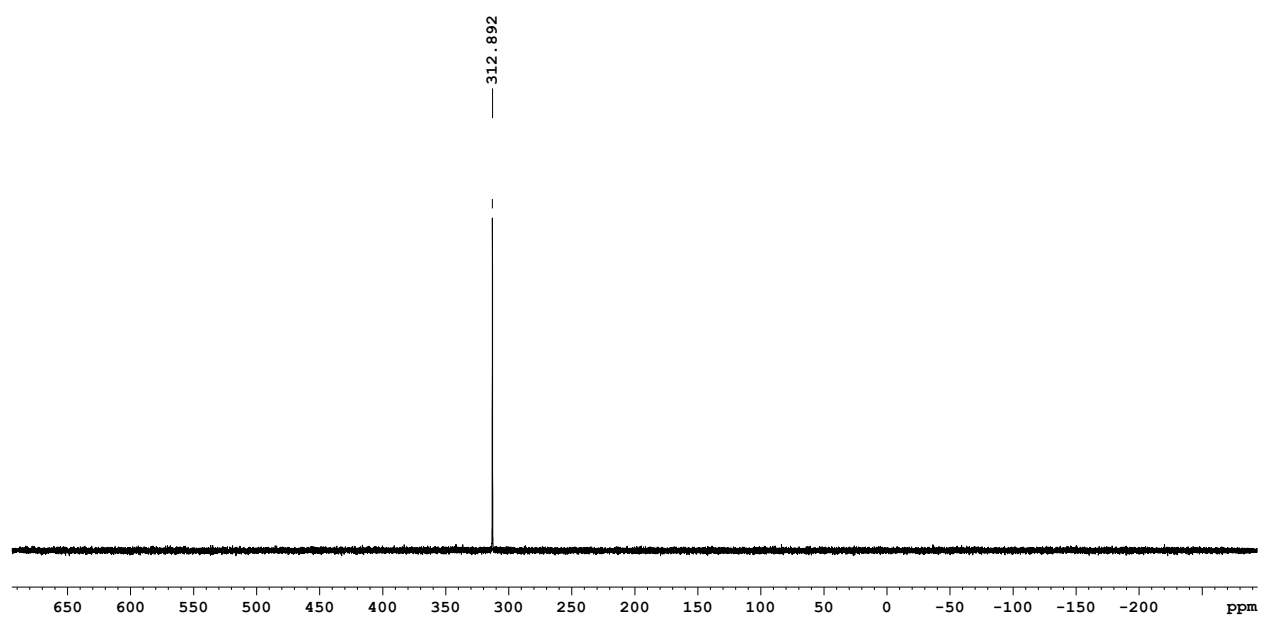

**Fig. S8.**  $^{31}\text{P}$  NMR spectrum of complex **2** ( $\text{C}_6\text{D}_6$ , ambient temperature).

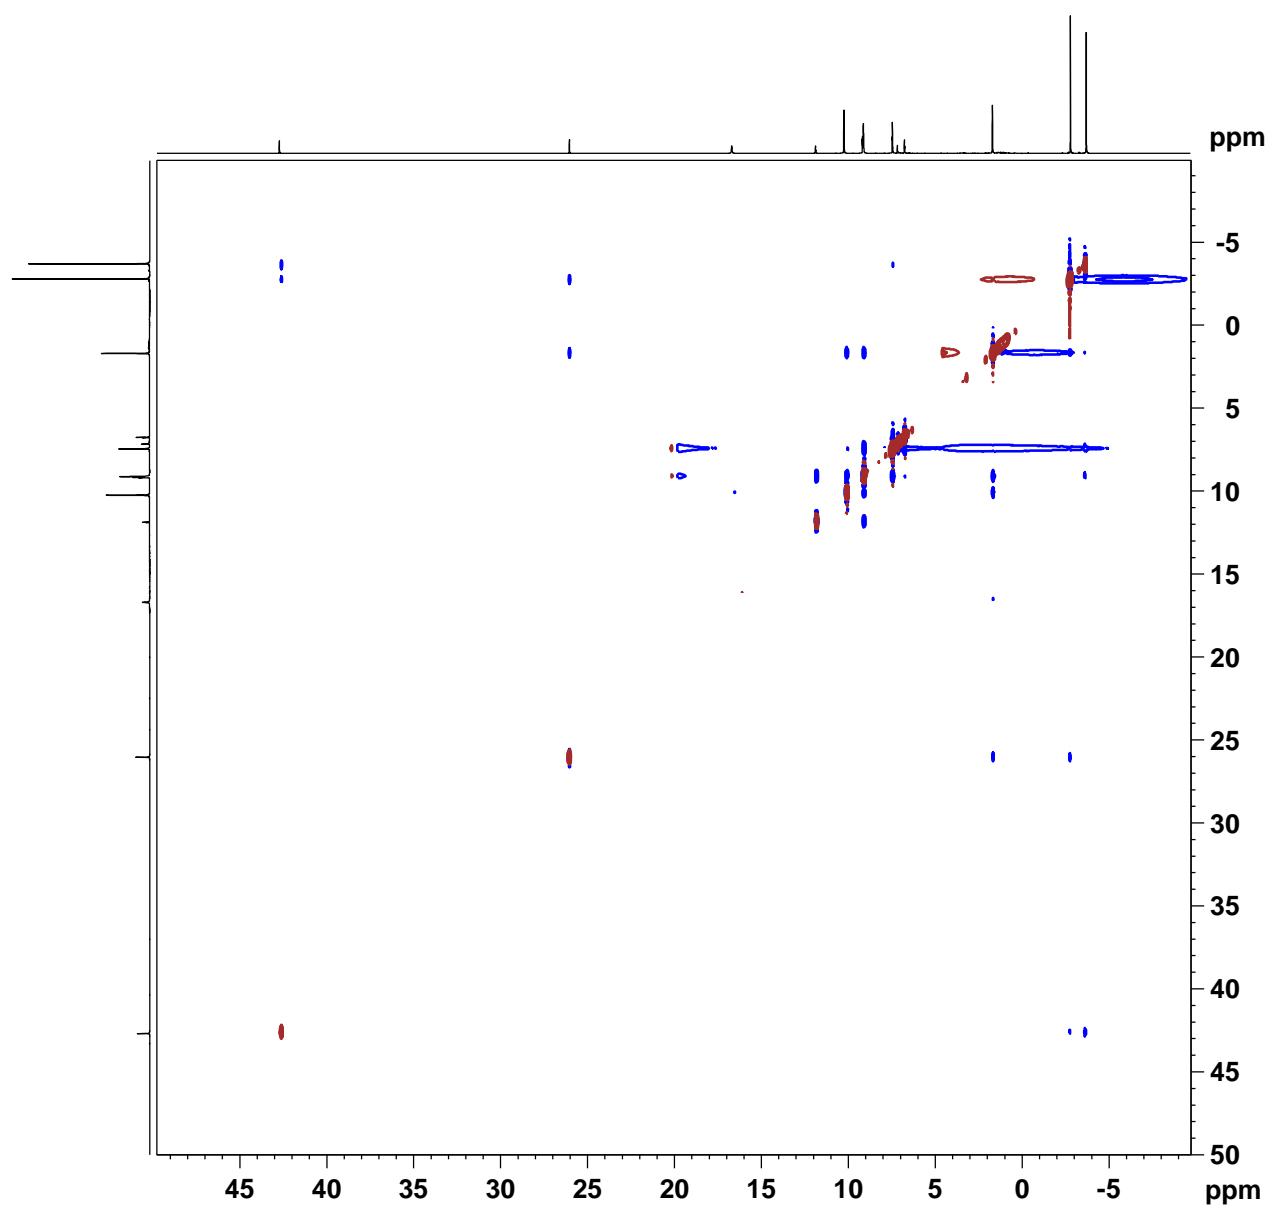

**Fig. S9.**  $^1\text{H}$ - $^1\text{H}$  NOESY NMR spectrum of complex **2** ( $\text{C}_6\text{D}_6$ , ambient temperature).



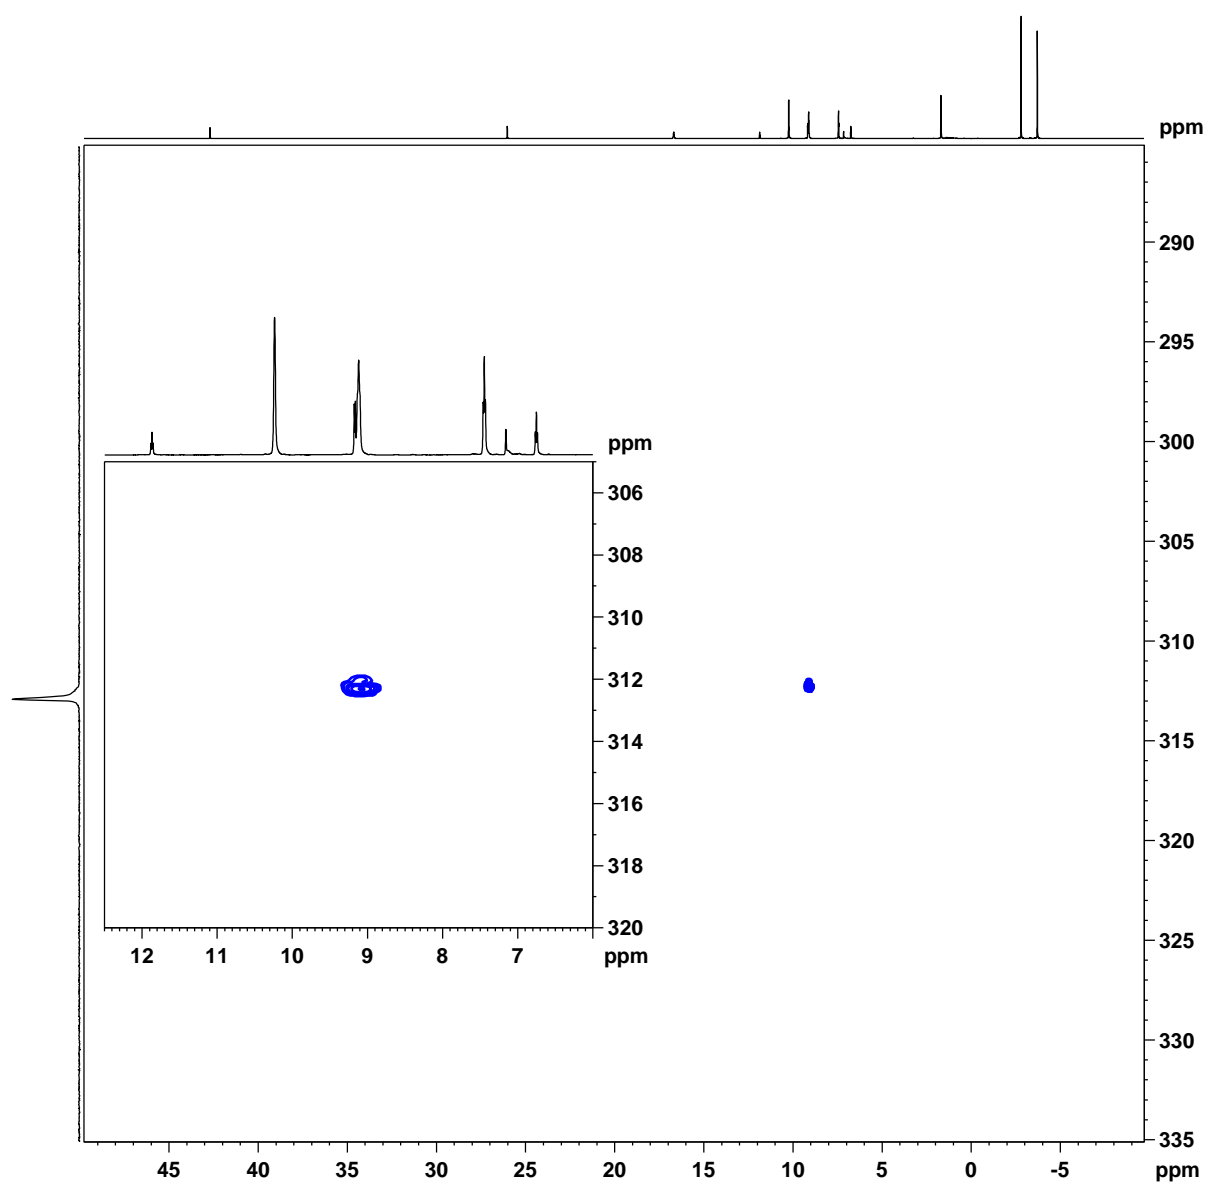

**Fig. S10.**  $^1\text{H}$  $^{31}\text{P}$  HMBC NMR spectrum of complex **2** ( $\text{C}_6\text{D}_6$ , ambient temperature).

### III. Quantum Chemical Calculations

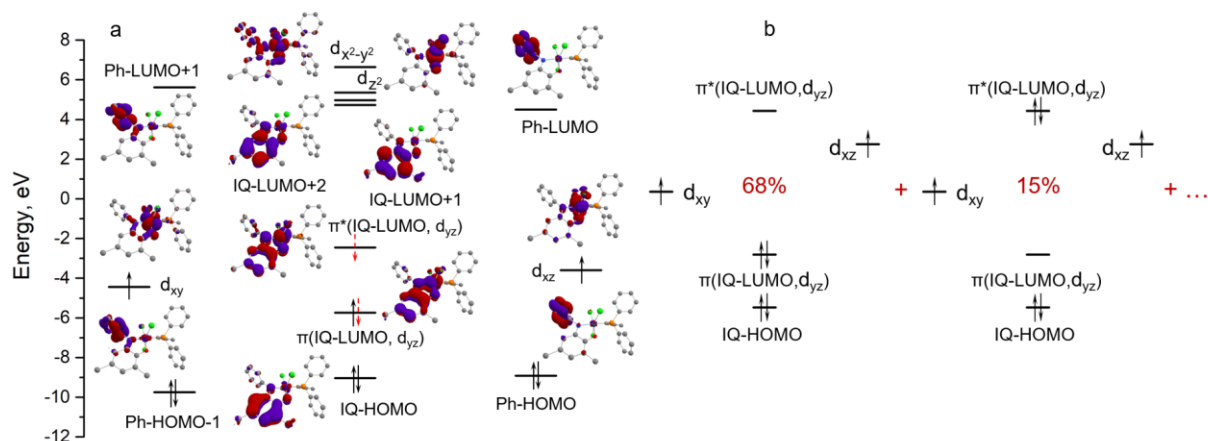

**Fig. S11.** a) Molecular orbitals of the active space (isosurface at 0.03) in the calculations at the DKH2-SA-CASSCF(10,13)/DKH-def2-TZVP level for complex **1m** (hydrogen atoms are omitted for clarity) with 1 quintet, 9 triplet, and 8 singlet states. The energies of active MOs were estimated by Fock operator averaging. b) The major electronic configurations contributing to the wave function of the ground triplet state of complex **1m**.

Note, that at all levels of theory, calculations predict the ground triplet state of complex **1**, well isolated from excited states. At the SA-CASSCF level, the quintet state is at 4147  $\text{cm}^{-1}$  and the singlet state at 8796  $\text{cm}^{-1}$ , while at the SA-CASSCF/NEVPT2 and SA-CASSCF/QD-NEVPT2 level, the singlet is at 4883 and 5054  $\text{cm}^{-1}$  and the quintet at 7517 and 7805  $\text{cm}^{-1}$ .

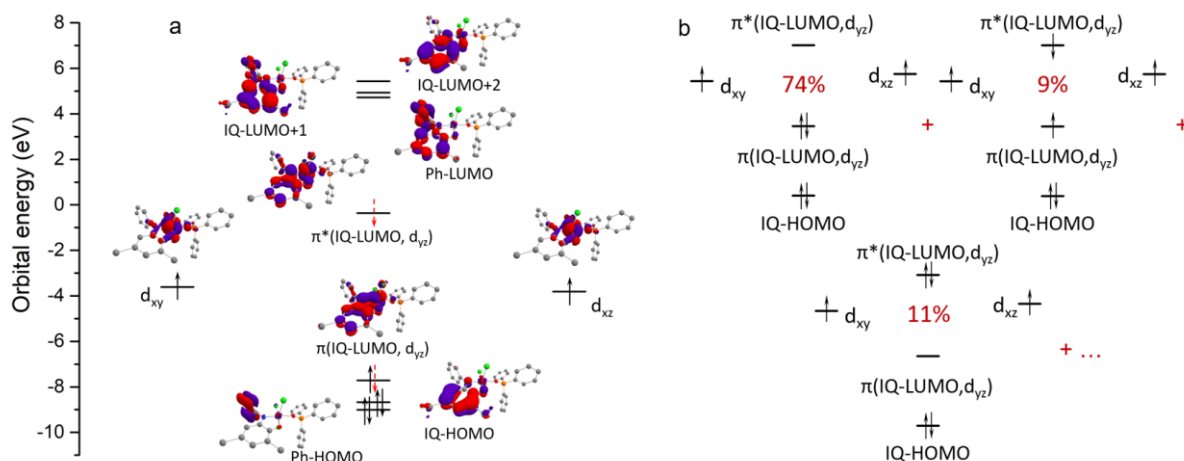

**Fig. S12.** Molecular orbitals of the active space (isosurface at 0.03) in calculations at the DKH2-CASSCF(10,13)/DKH-def2-TZVP level for the **2m** complex (hydrogen atoms are omitted for clarity). The energies of active MOs are estimated by Fock operator averaging. b) The major electronic configurations contributing to the wave function of the ground triplet state of complex **2m**.

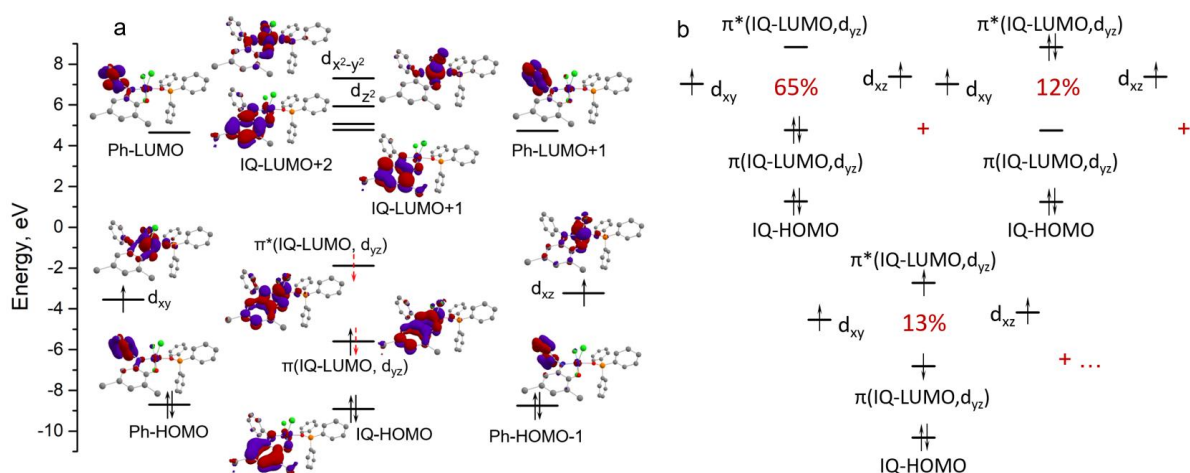

**Fig. S13.** Molecular orbitals of the active space (isosurface at 0.03) in calculations at the DKH2-SA-CASSCF(10,13)/DKH-def2-TZVP level for the **2m** complex (hydrogen atoms are omitted for clarity) with 1 quintet, 9 triplet, and 8 singlet states. The energies of active MOs are estimated by Fock operator averaging. b) The major electronic configurations contributing to the wave function of the ground triplet state of the **2m** complex.

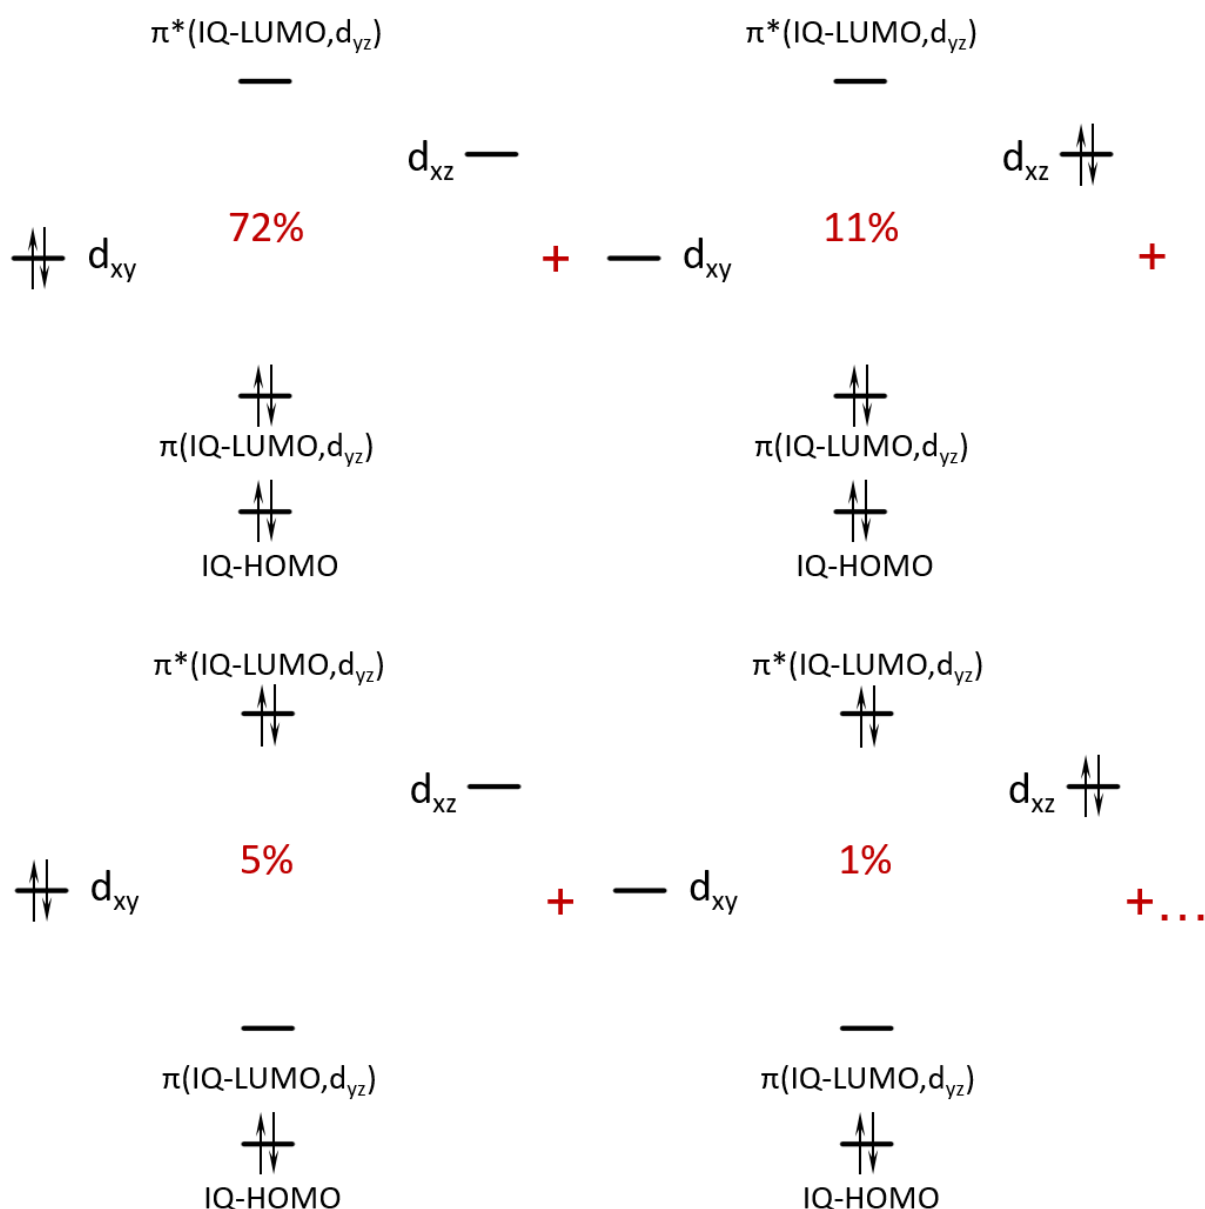

**Fig. S14.** Occupations of the active MOs in the configurations contributing mainly to the wave function of the lowest excited singlet state of complex **1m**.

The first excited singlet state of **1m** has, like the ground triplet state, a strongly multi-configuration wave function with major contributions from four electronic configurations with doubly occupied  $d_{xy}$  or  $d_{xz}$  orbitals and redistribution of electrons between  $\pi$ - and  $\pi^*$ -orbitals (Fig. S13). The wave function of the first excited quintet state has a dominant single configuration (90 %) with singly occupied  $d_{xy}$ ,  $d_{xz}$ ,  $\pi$ - and  $\pi^*$ -orbitals. The Mulliken spin population on Re in the quintet state is 2.73 at the CASSCF level, while the spin population of the iminooxolene ligand is 1.07.

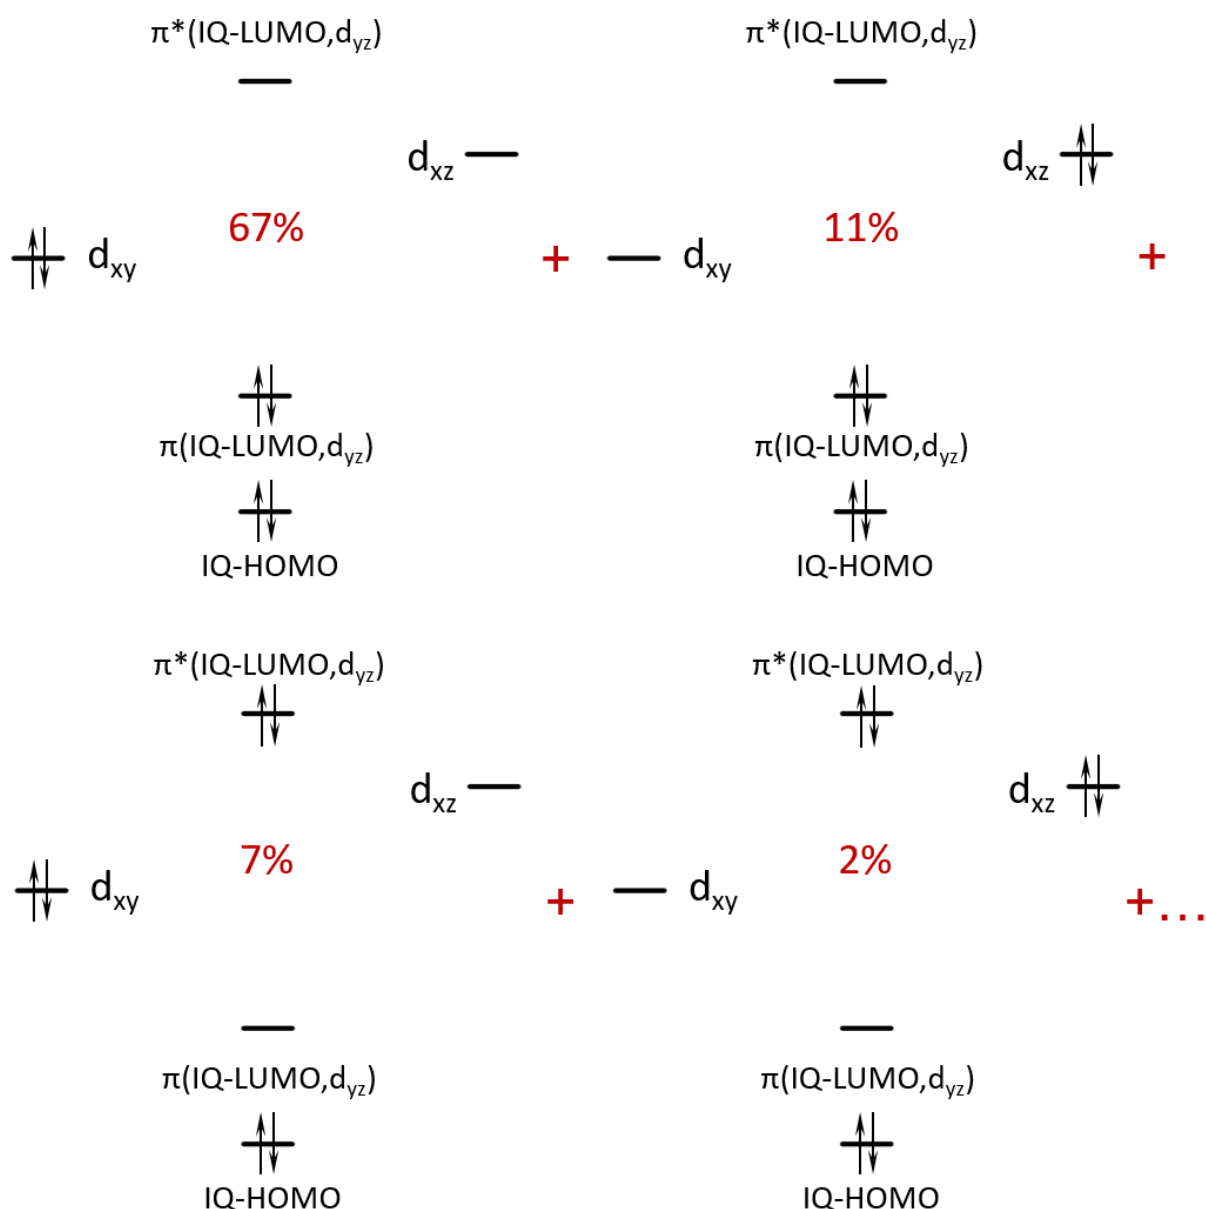

**Fig. S15.** Occupations of the MOs in the configurations contributing mainly to the wave function of the lowest excited singlet state of complex **2m**.

The first excited singlet state of complex **2m**, like **1m**, has a strongly multi-configuration wave function with major contributions of four electronic configurations with doubly occupied  $d_{xy}$  or  $d_{xz}$  orbitals and redistribution of electrons between  $\pi$ - and  $\pi^*$ -orbitals (Fig. S14). The wave function of the first excited quintet state has a single dominant configuration (94 %) with singly occupied  $d_{xy}$ ,  $d_{xz}$ ,  $\pi$ - and  $\pi^*$ -MOs. The Mulliken spin population on the Re ion in the quintet state is 2.73 at CASSCF level, while that of the iminooxolene ligand is 1.08.

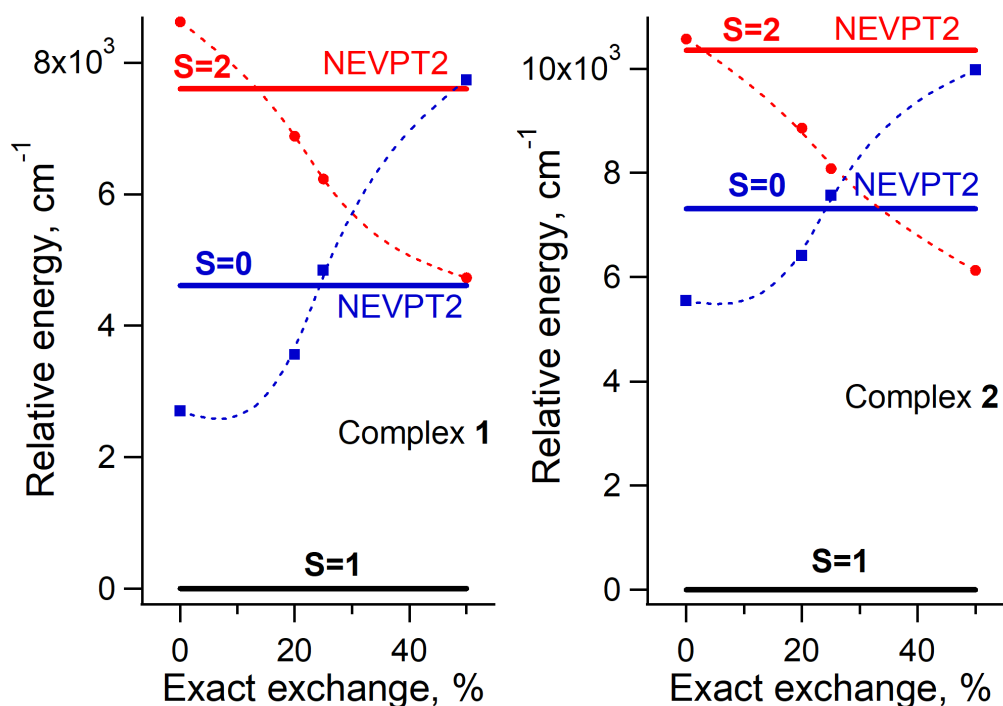

**Fig. S16.** The energies of the lowest singlet (blue squares) and quintet (red circles) states relative to the lowest triplet state of complexes **1m** (left) and **2m** (right) calculated at DFT level. The X-axis corresponds to the contribution of HF exchange (0 – BP86, 0.2 – B3LYP, 0.25 – PBE0, 0.5 – BHandHLYP).

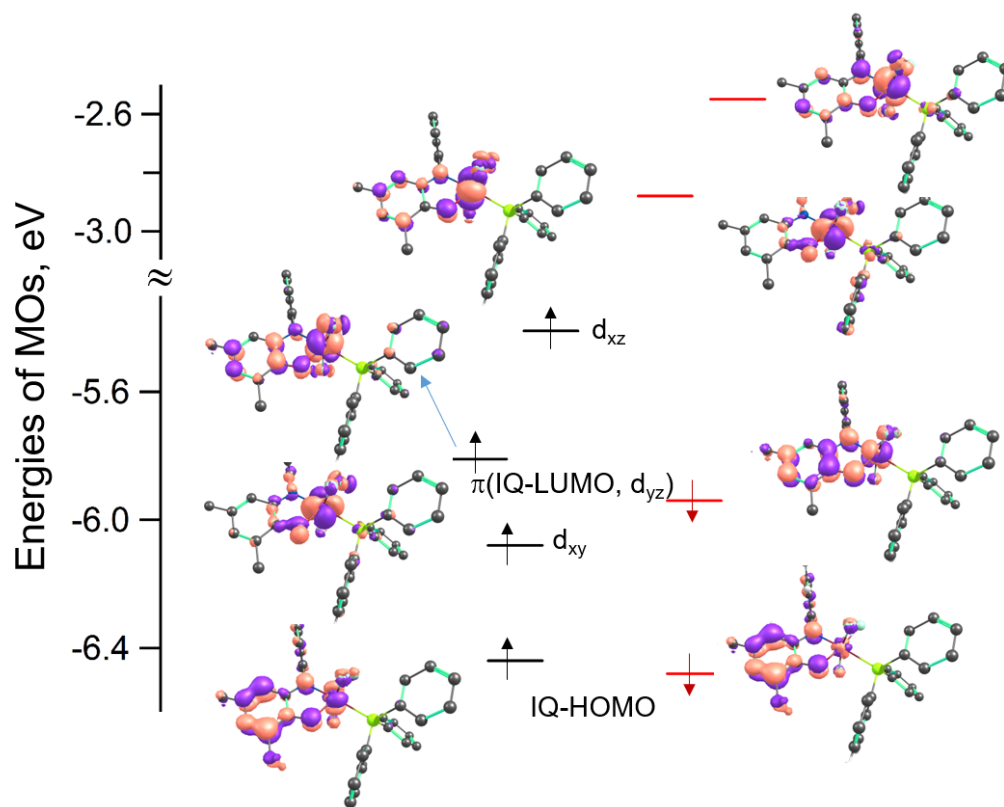

**Fig. S17.** The highest occupied  $\alpha$ -MOs (isosurface at 0.052) and their  $\beta$ -counterparts, as well as their energies, calculated at the DKH2-UB3LYP/DKH-def2-TZVP (SARS-DKH-TAVP for Re) level for complex **1m** (hydrogen atoms have been omitted for clarity).

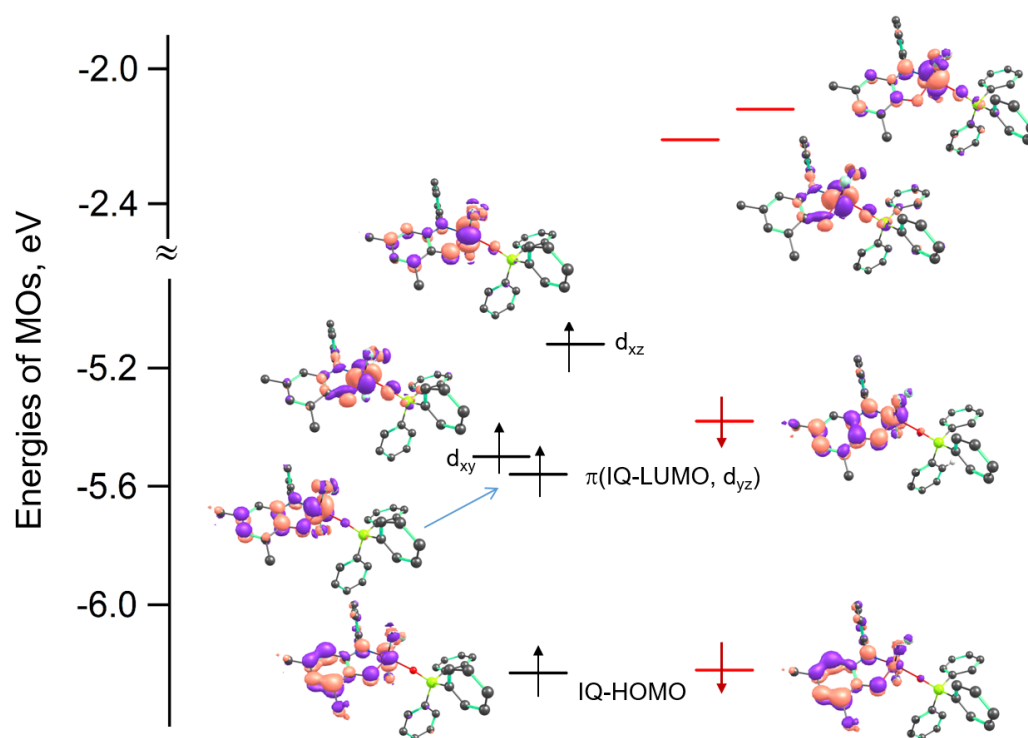

**Fig. S18.** The highest occupied  $\alpha$ -MOs (isosurface at 0.052) and their  $\beta$ -counterparts, as well as their energies, calculated at the DKH2-UB3LYP/DKH-def2-TZVP (SARS-DKH-TAVP for Re) level for complex **2m** (hydrogen atoms have been omitted for clarity).

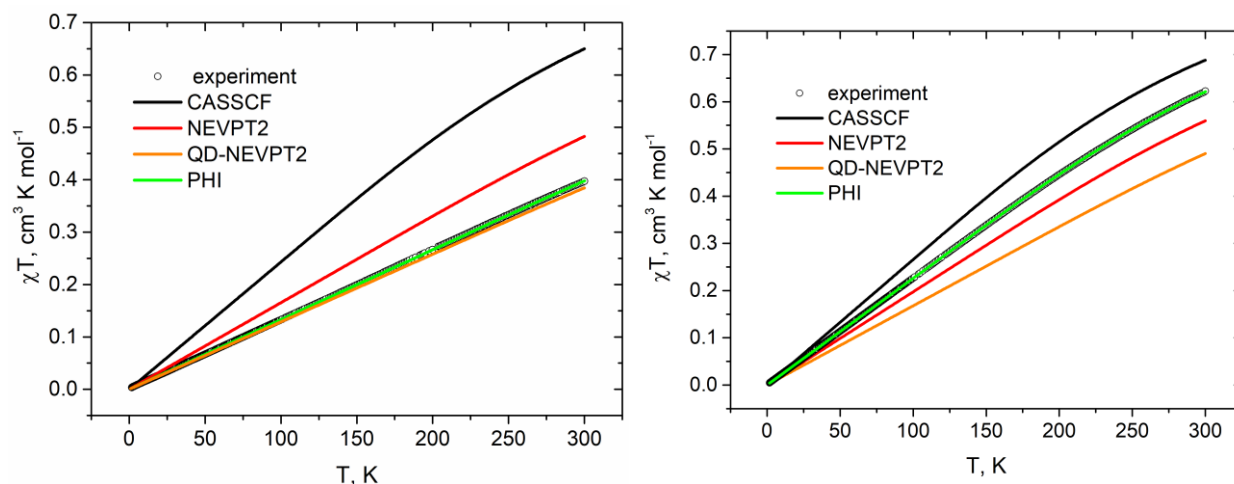

**Fig. S19.** Experimental temperature dependences of the product  $\chi T$  for complexes **1** (left) and **2** (right) obtained at a magnetic field of  $H = 1$  kOe (black circles). Theoretical  $\chi T$  vs  $T$  dependences calculated using the results of SA-CASSCF(10,13)/SOC-QDPT/DKH-def2-TZVP (black curves), SA-CASSCF(10,13)/NEVPT2/SOC-QDPT/DKH-def2-TZVP (red curves) and SA-CASSCF(10,13)/QD-NEVPT2/SOC-QDPT/DKH-def2-TZVP (orange curves) calculations taking into account 1 quintets, 9 triplets and 8 singlets for both complexes. Green curves show the best fits obtained using the spin-Hamiltonian and PHI program as described in the text.

In the case of **1**, the best agreement between experimental and theoretical  $\chi T$  vs  $T$  dependences was achieved using the QD-NEVPT2 approach, whereas in the case of **2**, it overestimated the  $D$  value and NEVPT2 gives a closer result. The admixture of the excited singlet states to the ground triplet state was found to be essential to reproduce the splitting of the latter (Tables S2, S3; Figure S19). These singlet states have an electronic configuration similar to that of the ground triplet state. Their contribution rises from CASSCF to QD-NEVPT2 levels from 4.4% to 10.5% for **1** and from 3% to 8.5% for **2**.



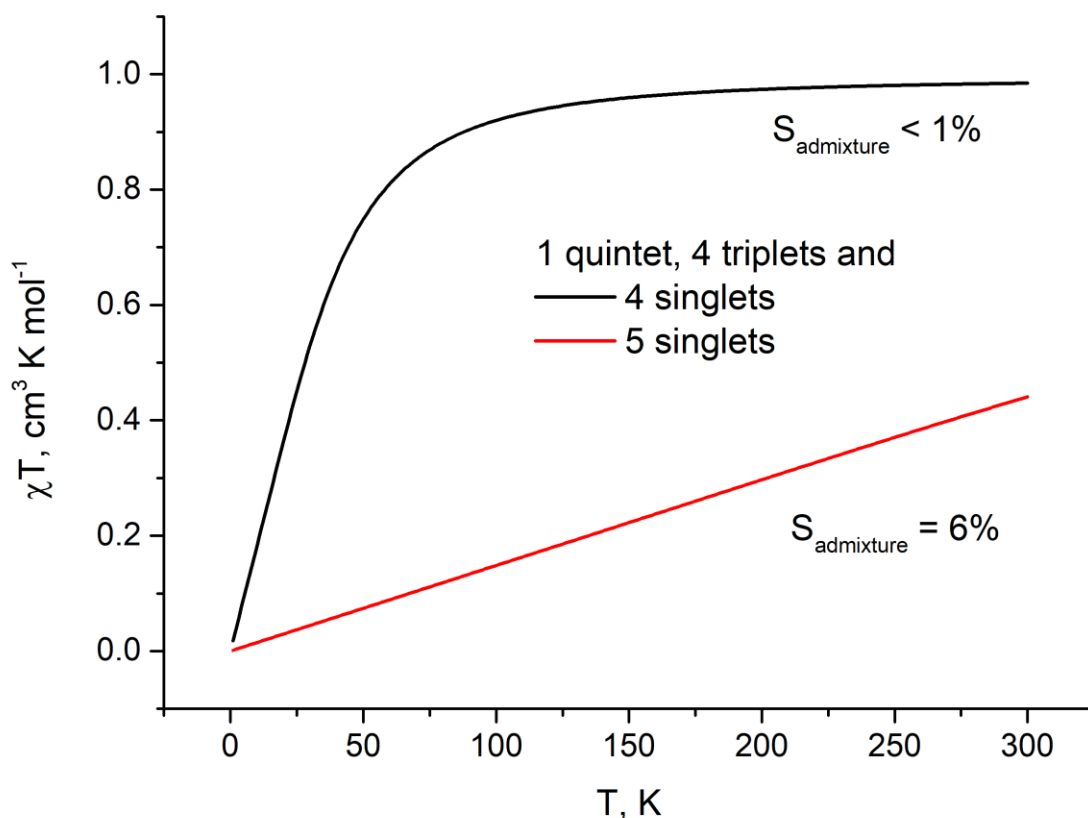

**Fig. S20.** Theoretical temperature dependences of the  $\chi T$  product for the **2m** complex calculated at the DKH2-SA-CASSCF(10,13)/QD-NEVPT2/SOC-QDPT)/DKH2-def2-TZVP level considering 1 quintet, 4 triplet, and different number of singlet states: 4 (black curve) and 5 (red curve).

Figure S19 shows that the theoretical temperature dependence of the  $\chi T$  product dramatically affected by the inclusion of the 5<sup>th</sup> singlet state in the SA-CASSCF calculations. This state resembles the ground triplet state and the 1<sup>st</sup> excited singlet state in terms of the occupation of active MOs. It is these singlet states that are strongly mixed into the lower sublevel of the ground triplet state when SOC is taken into account, which in turn leads to a sharp change in the behavior of  $\chi T$ .

|                    |                       |                       |                    |                               |
|--------------------|-----------------------|-----------------------|--------------------|-------------------------------|
| <u>0.05</u>        | <u>0.05</u>           | <u>0.04</u>           | <u>0.04</u>        | <u>0.03</u>                   |
| IQ-LUMO+1          |                       |                       |                    |                               |
| CAS-T <sub>0</sub> | CAS-T <sub>5</sub>    | CAS-T <sub>6</sub>    | CAS-T <sub>7</sub> | CAS-T <sub>8</sub>            |
| <u>0.36</u>        | <u>0.64</u>           | <u>0.89</u>           | <u>0.99</u>        | <u>0.91</u>                   |
| $\pi^*$            |                       |                       |                    |                               |
| <u>0.85</u>        | <u>1.21</u>           | <u>0.94</u>           | <u>0.87</u>        | <u>0.91</u>                   |
| $d_{xz}$           |                       |                       |                    |                               |
| <u>0.86</u>        | <u>0.85</u>           | <u>0.86</u>           | <u>0.31</u>        | <u>0.75</u>                   |
| $d_{xy}$           |                       |                       |                    |                               |
| <u>1.47</u>        | <u>0.98</u>           | <u>0.99</u>           | <u>1.44</u>        | <u>1.28</u>                   |
| $\pi$              |                       |                       |                    |                               |
| <u>1.88</u>        | <u>1.70</u>           | <u>1.73</u>           | <u>1.85</u>        | <u>1.56</u>                   |
| IQ-HOMO            |                       |                       |                    |                               |
| <hr/>              |                       |                       |                    |                               |
|                    | $d_{xz}, \pi^*$       | $\pi^*, d_{xz}$       | $\pi^*$            | $\pi^*, d_{xz}$               |
|                    | ↑                     | ↑                     | ↑                  | ↑                             |
|                    | $\pi, \text{IQ-HOMO}$ | $\pi, \text{IQ-HOMO}$ | $d_{xy}$           | $\text{IQ-HOMO}, \pi, d_{xz}$ |

**Fig. S21.** Occupation numbers of active MOs in the ground and excited triplet states calculated for the **1m** complex at the SA-CASSCF(10,13)/QD-NEVPT2/ DKH2-def2-TZVP level.

|                    |                          |                    |                    |                       |                    |                    |                    |                               |             |
|--------------------|--------------------------|--------------------|--------------------|-----------------------|--------------------|--------------------|--------------------|-------------------------------|-------------|
|                    | <u>0.03</u>              | <u>0.03</u>        | <u>0.03</u>        | <u>0.03</u>           | <u>0.04</u>        | <u>0.03</u>        | <u>0.01</u>        | <u>0.03</u>                   | <u>0.04</u> |
| IQ-LUMO+1          |                          |                    |                    |                       |                    |                    |                    |                               |             |
| CAS-T <sub>0</sub> | CAS-T <sub>1</sub>       | CAS-T <sub>2</sub> | CAS-T <sub>3</sub> | CAS-T <sub>4</sub>    | CAS-T <sub>5</sub> | CAS-T <sub>6</sub> | CAS-T <sub>7</sub> | CAS-T <sub>8</sub>            |             |
| <u>0.32</u>        | <u>1.04</u>              | <u>0.69</u>        | <u>0.89</u>        | <u>0.40</u>           | <u>0.75</u>        | <u>0.81</u>        | <u>0.93</u>        | <u>1.06</u>                   |             |
| $\pi^*$            |                          |                    |                    |                       |                    |                    |                    |                               |             |
| <u>0.86</u>        | <u>0.85</u>              | <u>0.83</u>        | <u>0.86</u>        | <u>0.85</u>           | <u>0.96</u>        | <u>1.09</u>        | <u>0.86</u>        | <u>0.86</u>                   |             |
| $d_{xy}$           | $d_{xz}$                 |                    |                    |                       |                    |                    |                    |                               |             |
| <u>1.55</u>        | <u>1.62</u>              | <u>1.21</u>        | <u>0.99</u>        | <u>0.93</u>           | <u>1.09</u>        | <u>1.06</u>        | <u>0.94</u>        | <u>1.40</u>                   |             |
| $\pi$              |                          |                    |                    |                       |                    |                    |                    |                               |             |
| <u>1.89</u>        | <u>1.75</u>              | <u>1.91</u>        | <u>1.89</u>        | <u>1.73</u>           | <u>1.91</u>        | <u>1.92</u>        | <u>1.89</u>        | <u>1.38</u>                   |             |
| IQ-HOMO            |                          |                    |                    |                       |                    |                    |                    |                               |             |
| <hr/>              |                          |                    |                    |                       |                    |                    |                    |                               |             |
|                    | $\pi^*, \pi$             | $\pi^*$            | $\pi^*$            | $d_{xz}, \pi^*$       | $\pi^*, d_{xy}$    | $\pi^*, d_{xy}$    | $\pi^*$            | $\pi^*$                       |             |
|                    | $d_{xz}, \text{IQ-HOMO}$ | $\pi$              | $\pi$              | $\pi, \text{IQ-HOMO}$ | $\pi, d_{xz}$      | $\pi, d_{xz}$      | $\pi$              | $\text{IQ-HOMO}, \pi, d_{xz}$ |             |

**Fig. S22.** Occupation numbers of active MOs in the ground and excited triplet states calculated for the **2m** complex at the SA-CASSCF(10,13)/QD-NEVPT2/def2-TZVP-DKH2 level.

**Table S2.** Compositions of wave functions with certain  $S$  and  $M_S$  from the CASSCF calculations, corresponding to three sublevels of the **1m** complex, arising from the ground triplet multiplet due to the SOC.

| Sub-state | NEVPT2              |        |      |      |    | QD-NEVPT2           |        |      |      |    |
|-----------|---------------------|--------|------|------|----|---------------------|--------|------|------|----|
|           | E, cm <sup>-1</sup> | Weight | Root | Spin | Ms | E, cm <sup>-1</sup> | Weight | Root | Spin | Ms |
| 0         | 0                   | 0.440  | 0    | 1    | 1  | 0                   | 0.431  | 0    | 1    | 1  |
|           |                     | 0.0197 | 0    | 1    | 0  |                     | 0.018  | 0    | 1    | 0  |
|           |                     | 0.434  | 0    | 1    | -1 |                     | 0.431  | 0    | 1    | -1 |
|           |                     | 0.058  | 0    | 0    | 0  |                     | 0.079  | 0    | 0    | 0  |
|           |                     | 0.030  | 5    | 0    | 0  |                     | 0.026  | 5    | 0    | 0  |
| 1         | 737                 | 0.068  | 1    | 1    | 1  | 950                 | 0.080  | 0    | 1    | 1  |
|           |                     | 0.845  | 1    | 1    | 0  |                     | 0.821  | 0    | 1    | 0  |
|           |                     | 0.068  | 1    | 1    | -1 |                     | 0.080  | 0    | 1    | -1 |
|           |                     | 0.013  | 6    | 0    | 0  |                     |        |      |      |    |
| 2         | 776                 | 0.433  | 1    | 1    | 1  | 971                 | 0.420  | 0    | 1    | 1  |
|           |                     | 0.114  | 1    | 1    | 0  |                     | 0.140  | 0    | 1    | 0  |
|           |                     | 0.433  | 1    | 1    | -1 |                     | 0.420  | 0    | 1    | -1 |

**Table S3.** Compositions of wave functions with certain  $S$  and  $M_S$  from the CASSCF calculations, corresponding to three sublevels of the **2m** complex, arising from the ground triplet multiplet due to the SOC.

| State | NEVPT2              |          |      |      |    | QD-NEVPT2           |          |      |      |    |
|-------|---------------------|----------|------|------|----|---------------------|----------|------|------|----|
|       | E, cm <sup>-1</sup> | Weight   | Root | Spin | Ms | E, cm <sup>-1</sup> | Weight   | Root | Spin | Ms |
| 0     | 0                   | 0.065492 | 0    | 1    | 1  | 0                   | 0.065818 | 0    | 1    | 1  |
|       |                     | 0.802334 | 0    | 1    | 0  |                     | 0.796432 | 0    | 1    | 0  |
|       |                     | 0.065492 | 0    | 1    | -1 |                     | 0.065818 | 0    | 1    | -1 |
|       |                     | 0.046665 | 5    | 0    | 0  |                     | 0.014271 | 0    | 0    | 0  |
|       |                     |          |      |      |    |                     | 0.043899 | 5    | 0    | 0  |
| 1     | 636                 | 0.489164 | 0    | 1    | 1  | 762                 | 0.489405 | 0    | 1    | 1  |
|       |                     | 0.489164 | 0    | 1    | -1 |                     | 0.489405 | 0    | 1    | -1 |
|       |                     | 0.013946 | 6    | 0    | 0  |                     |          |      |      |    |
| 2     | 685                 | 0.421974 | 0    | 1    | 1  | 787                 | 0.421691 | 0    | 1    | 1  |
|       |                     | 0.137364 | 0    | 1    | 0  |                     | 0.137154 | 0    | 1    | 0  |
|       |                     | 0.421974 | 0    | 1    | -1 |                     | 0.421691 | 0    | 1    | -1 |
|       |                     | 0.010095 | 7    | 0    | 0  |                     |          |      |      |    |

The largest positive contributions to the  $D$  value come from the interactions of the ground triplet state with the first and sixth excited singlet states (427 and 535 cm<sup>-1</sup>, respectively) for **1m** and with the sixth singlet state (730 cm<sup>-1</sup>) for **2m**. All of these excited states have a multi-configuration composition similar to the ground triplet state, the main difference being only the occupancy of one of the  $d_{xy}$  or  $d_{xz}$  orbitals by two electrons. A rough estimate of the  $D$  values for

the lowest excited quintet states gives values close to  $\sim 140\text{ cm}^{-1}$  and  $\sim 60\text{ cm}^{-1}$  for **1m** and **2m**, which is significantly smaller than for the ground triplet states but typical for rhenium complexes.

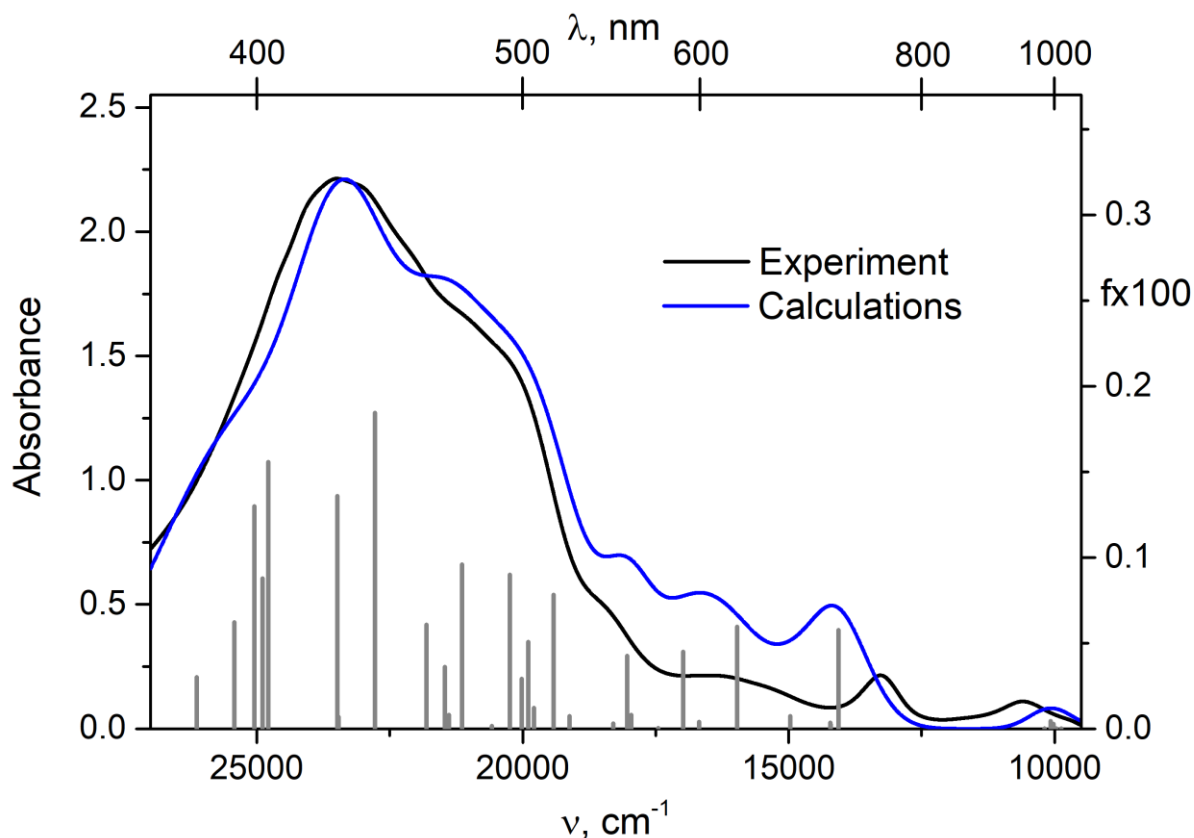

**Fig. S23.** Experimental electronic absorption spectrum of complex **2** in CH<sub>2</sub>Cl<sub>2</sub> solution (black curve). Gray bars represent positions and oscillator strengths of electronic transitions calculated at the SA-CASSCF(10,13)/QD-NEVPT2/SOC-QDPT level taking into account 1 quintet, 9 triplets and 8 singlets for the modified complex **2m**. Blue curve corresponds to the calculated absorption spectrum assuming a Gaussian shape of the bands of individual electronic transitions using the given calculated data and the ORCA\_ASA program. The bandwidths were individually chosen for each transition.

Overall, Figure S23 demonstrates very good agreement between theory and experiment. Moreover, it shows that the calculated transitions are densely distributed within the experimental spectral region (370 – 1100 nm or  $(27 - 9) \times 10^3 \text{ cm}^{-1}$ ). The most intense electronic transition is predicted to be at 439 nm ( $22780 \text{ cm}^{-1}$ ), which is in good agreement with the maximum at 426 nm ( $23470 \text{ cm}^{-1}$ ) and corresponds to excitation from the ground state to the 32<sup>th</sup> magnetic sublevel. This sublevel has a larger contribution from the 5<sup>th</sup> (T<sub>5</sub>, 33%) and 6<sup>th</sup> (T<sub>6</sub>, 19%) triplet and 6<sup>th</sup> (23%) singlet states. Figure S22 shows that the T<sub>0</sub> → T<sub>5</sub> and T<sub>0</sub> → T<sub>6</sub> transitions lead to the population of π\* and d<sub>xy</sub> MOs at the expense of π and d<sub>xz</sub>. Considering the composition of π and π\*, it can be concluded that the transition under consideration is a superposition of LMCT, intra-ligand and d-d transitions.

The shoulder around 490 nm ( $\sim 20410$ ) can be attributed to two strong calculated transitions at 473 and 494 nm, corresponding to excitations to the 28<sup>th</sup> and 26<sup>th</sup> magnetic sublevels. A closer

look reveals similarities in the nature of these transitions. The 28<sup>th</sup> sublevel is a superposition of the 6<sup>th</sup> (28%), 4<sup>th</sup> (22%), 8<sup>th</sup> (16%), and 5<sup>th</sup> (12%) triplet states, while the 26<sup>th</sup> sublevel has two largest contributions from the 4<sup>th</sup> (50%) and 6<sup>th</sup> (22%) triplet states. According to the Figure S22, the  $T_0 \rightarrow T_4$  transition is mainly the  $\pi$ -to- $d_{xz}$  electron transition, while  $T_0 \rightarrow T_8$  is determined by the IQ-HOMO depopulation in favor of  $\pi^*$ . Thus, like the previous transition, it has a complex nature.

As in the case of complex **1**, the long-wavelength band at 943 nm (10600 cm<sup>-1</sup>) is related to spin-forbidden transitions. Two close in position (998 and 992 nm) and in intensity calculated transitions correspond to the excitations to the 7<sup>th</sup> and 8<sup>th</sup> sublevels. Both sublevels originate from the 0<sup>th</sup> quintet and 1<sup>st</sup> singlet states, namely, the 7<sup>th</sup> is a superposition of 71% quintet and 26% singlet, and the 8<sup>th</sup> is 81% quintet and 14% singlet.

The next three experimental absorption bands are characterized by maxima at about 753 and 608 (13280 and 16450 cm<sup>-1</sup>) and shoulder at 545 nm (18359) and can be roughly attributed to the transitions from the ground to the 1<sup>st</sup>, 2<sup>nd</sup> and 3<sup>rd</sup> triplets. More specifically, the calculated intense transition at 711 nm (14060 cm<sup>-1</sup>) corresponds to the excitation to the 10<sup>th</sup> sublevel, which is 78% of the 1<sup>st</sup> triplet. The  $T_0 \rightarrow T_1$  is mainly a  $d_{xz}$  to  $\pi^*$  transition, namely a combination of d-d and MLCT. The next two calculated transitions at 626 and 589 nm (15970 and 16980 cm<sup>-1</sup>) originate from the excitations to the 14<sup>th</sup> and 16<sup>th</sup> sublevels. The 14<sup>th</sup> sublevel has 38% of 2<sup>nd</sup> triplet and 29% of 3<sup>rd</sup> singlet states, while the 16<sup>th</sup> sublevel consists of the 2<sup>nd</sup> triplet (44%) and 3<sup>rd</sup> singlet (36%) states. The last transition at 555 nm (18020 cm<sup>-1</sup>) occurs to the 19<sup>th</sup> sublevel with 57% of the 3<sup>rd</sup> and 13 % of the 2<sup>nd</sup> triplet states. Both  $T_0 \rightarrow T_2$  and  $T_0 \rightarrow T_3$  lead to a population transfer from  $\pi$  to  $\pi^*$ , i.e. they partially have a LMCT character.

## IV. Cyclic Voltammetry Data and Crystal Structure of Complex 3

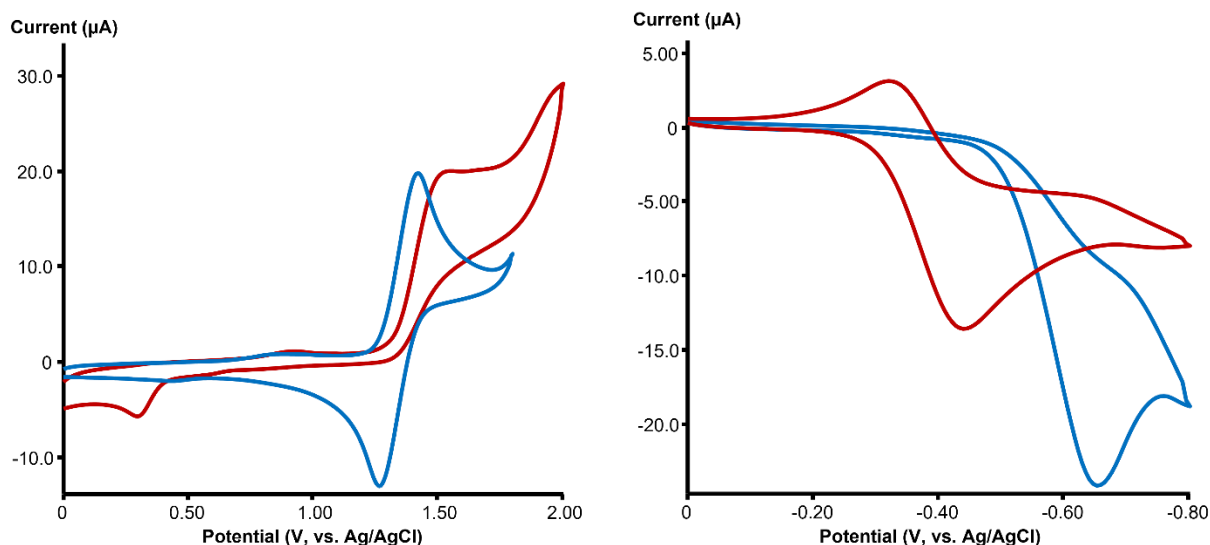

**Fig. S24.** Cyclic voltammograms of complexes **1** (red line) and **2** (blue line) in CH<sub>2</sub>Cl<sub>2</sub> at a potential scan rate of 100 mV/s: left – oxidation; right – reduction.

Complexes **1** and **2** differ significantly in their electrochemical stability: complex **1** is irreversibly oxidized at  $E_p^{ox} = 1.50$  V, while complex **2** exhibits reversible oxidation at  $E_{1/2} = 1.35$  V. On the other hand, complex **2** is irreversibly reduced at  $E_p^{red} = -0.64$  V. Complex **1** is more readily reduced, its reduction potential is noticeably shifted toward a more anodic region ( $E_{1/2} = -0.38$  V), and its reduction is more reversible. However, the current ratio  $I_a/I_c$  deviates significantly from unity, indicating that this process is not completely reversible. Thus, a reversible or quasi-reversible process is observed for only one of the complexes (for **2** during oxidation and for **1** during reduction). Therefore, only  $E_p^{red}$  (the reduction peaks) or  $E_p^{ox}$  (the oxidation peaks) can be compared for **1** and **2**. It can be seen from the Figure that the difference in potentials of the oxidation peaks ( $E_p^{ox}(1) - E_p^{ox}(2)$ ) is noticeably less (113 mV) than the difference in reduction peaks ( $E_p^{red}(1) - E_p^{red}(2) = 220$  mV).

In the calculations, the half-wave potentials ( $E_{1/2}$ ) are determined. It is reasonable to assume that the difference in reduction or oxidation potentials is close to the difference of corresponding half-wave potentials. The potential of the first half-wave can be calculated using the free energy of reduction ( $A + e \rightarrow A^-$ ) or oxidation ( $D^+ + e \rightarrow D$ ) reactions ( $\Delta G_r$ ) according to the formula

$$E_{1/2}^{red,ox} = \text{constant}(\text{electrode, solvent}) - \Delta G_r/F,$$

where the constant depends only on the electrode type and solvent.

For complexes **1** and **2**, geometry optimization was performed using the (U)B3LYP functional with the def2-TZVP basis set (with ECP for Re), the RIJCOSX approximation with the def2/J auxiliary basis set and DefGrid3. Recall that for both complexes the ground state is triplet, so oxidation / reduction can produce ions with multiplicity 2 or 4. Multiplicities 4 and 2 were used for the anionic and cationic forms of complexes, respectively, since for both



complexes, it was found that anions with a multiplicity 4 have lower energies than anions with a multiplicity of 2 and vice versa for cations.

The difference of the calculated half-wave potentials of reduction ( $E_{1/2}^{red}(1) - E_{1/2}^{red}(2)$ ) is 340 mV, which is in good agreement with the experiment difference in the potentials of reduction peaks (220 mV). In the case of oxidation, the calculated difference of the half-wave potentials ( $E_{1/2}^{ox}(1) - E_{1/2}^{ox}(2)$ ) is 110 mV, which is almost identical to the experimental difference in the oxidation peak potentials (113 mV).

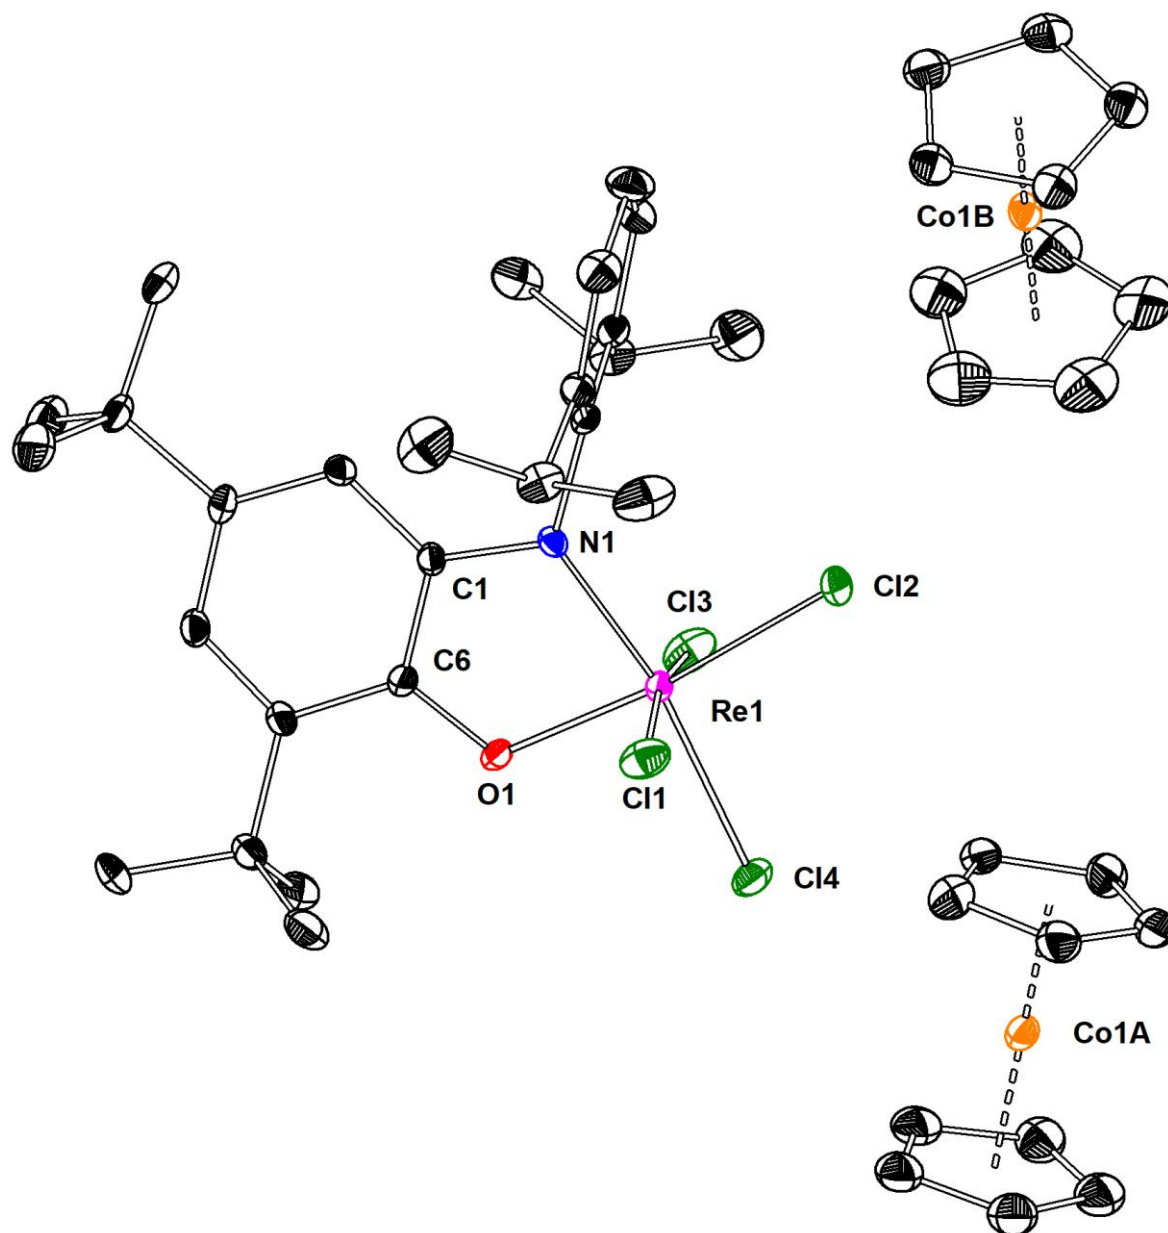

**Fig. S25.** Molecular structures of complex **3**. Thermal ellipsoids are given in 30% probability. Hydrogen atoms are omitted for clarity. Selected bond lengths (Å): Re1–Cl1 2.3696(17), Re1–Cl2 2.3211(16), Re1–Cl3 2.3397(18), Re1–Cl4 2.3841(16), Re1–O1 1.980(4), Re1–N1 2.003(5), O1–C6 1.329(8), N1–C1 1.372(8), C1–C6 1.414(9).

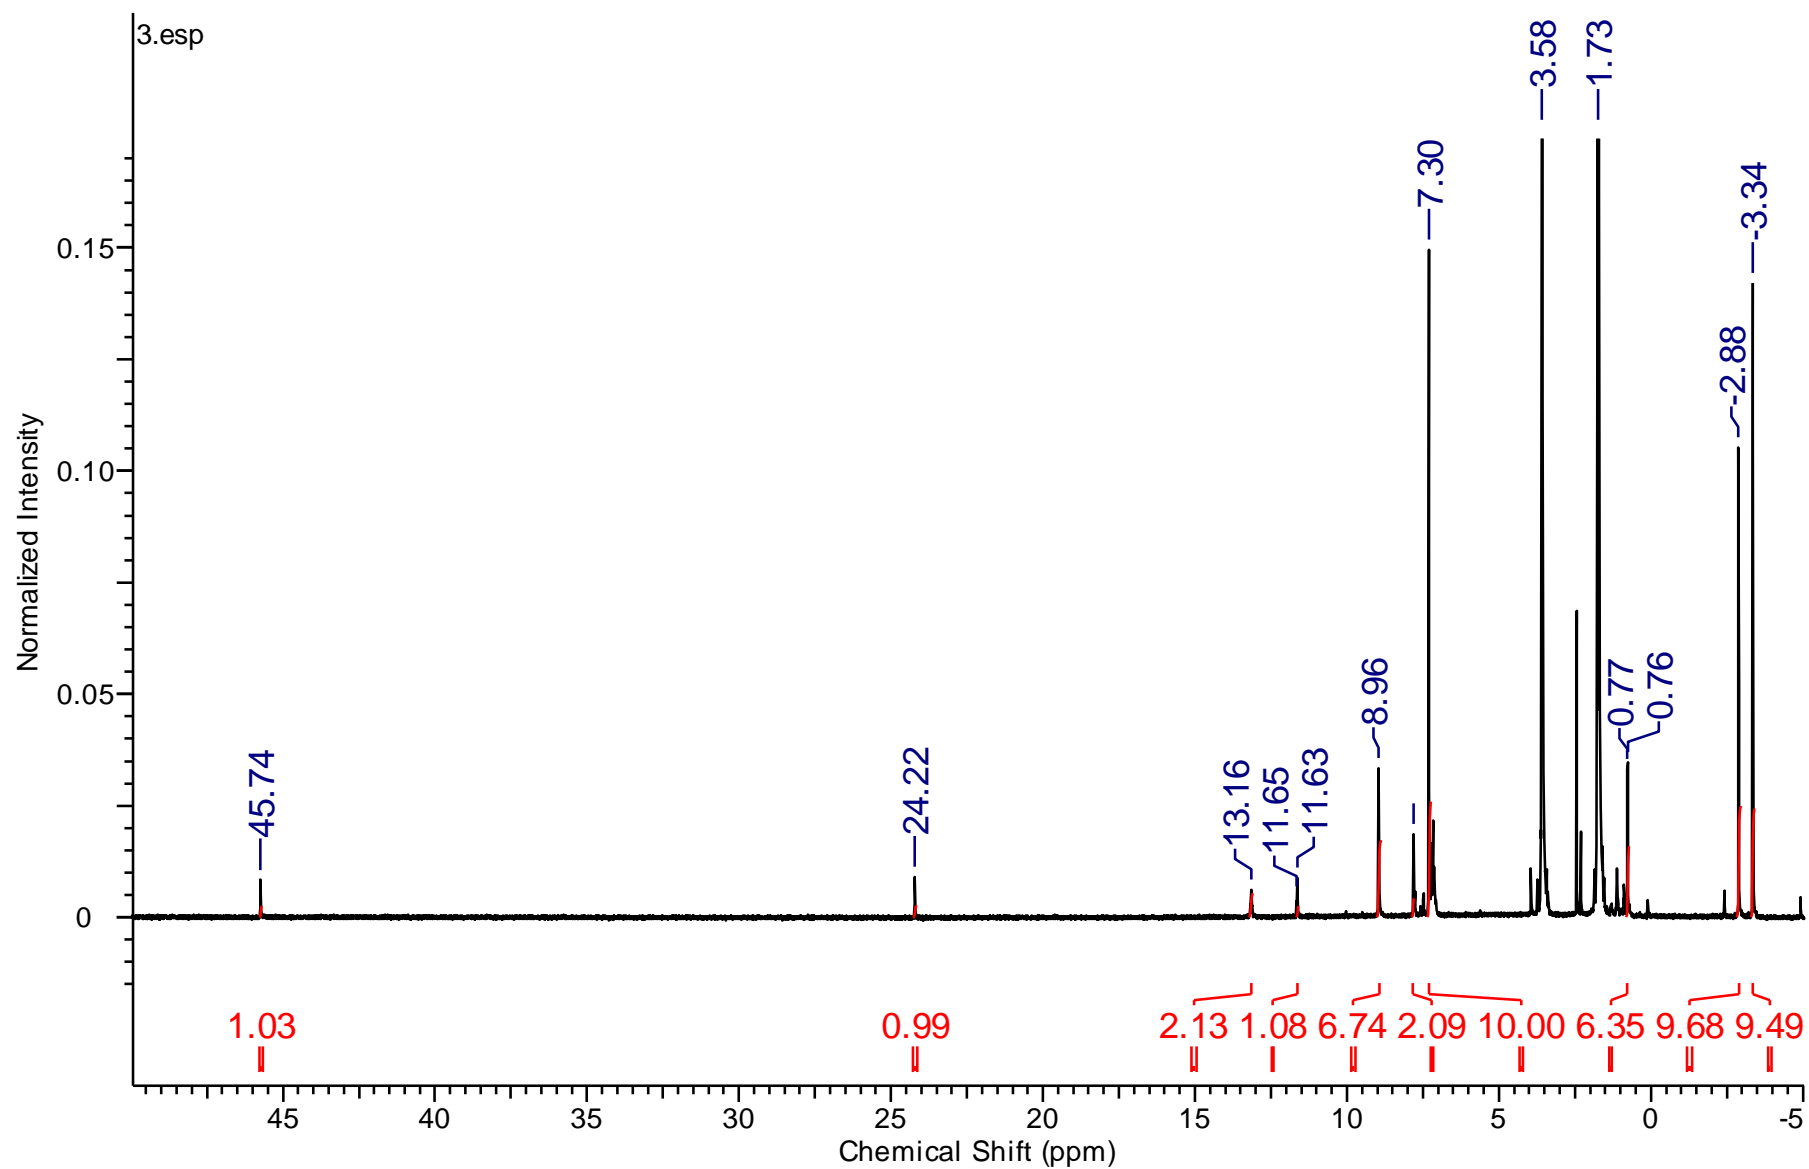

**Fig. S26.**  $^1\text{H}$  NMR spectrum of complex **3** (thf- $\text{d}_8$ , ambient temperature).

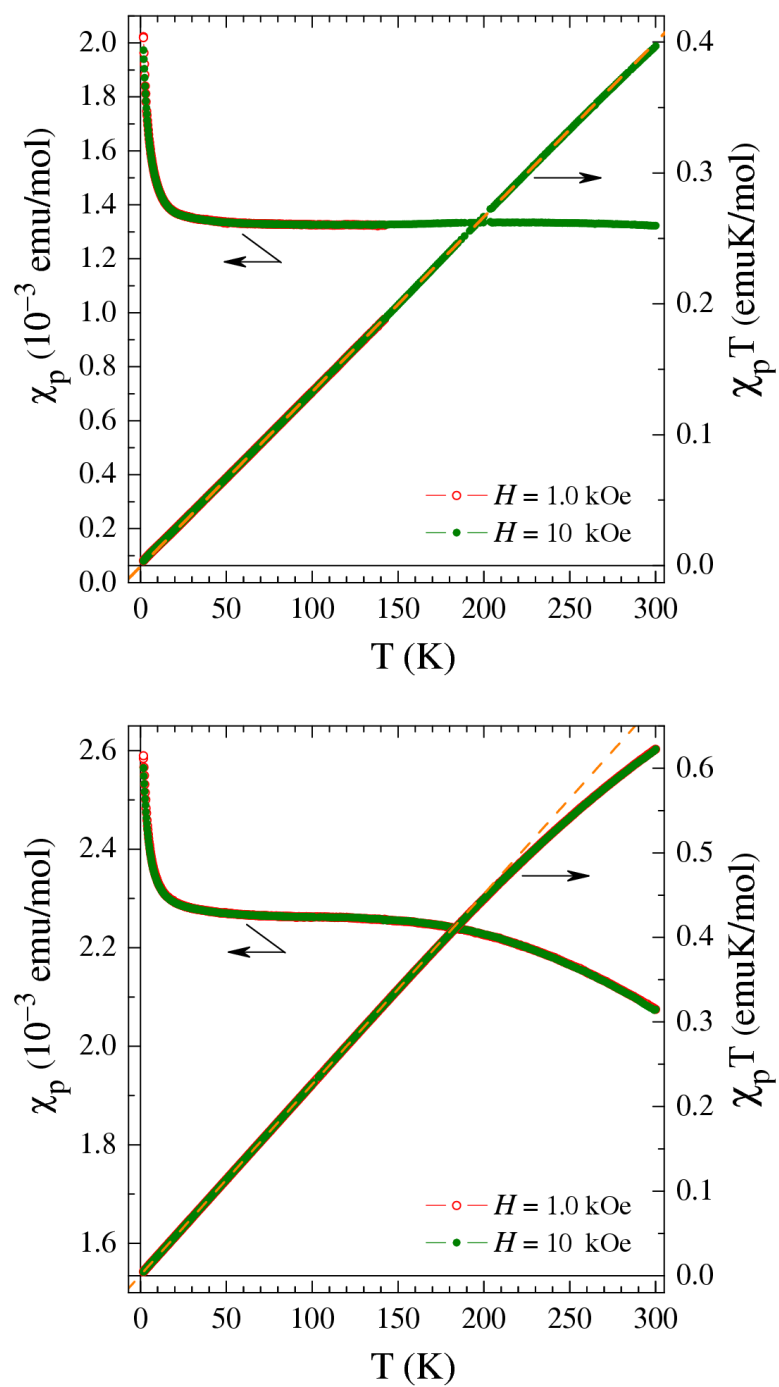

**Fig. S27.** Temperature dependences of the paramagnetic component of the magnetic susceptibility  $\chi_p$  and the product  $\chi_p T$ , measured for **1** (top) and **2** (bottom) at magnetic fields  $H = 1, 10$  kOe.

**Table S4. Calculated MOS values for known Re complexes with iminoxolene ligands**

| Refcode | Formula                                                                                                  | MOS                  | Reference |
|---------|----------------------------------------------------------------------------------------------------------|----------------------|-----------|
| CAWMOD  | $[\text{Re}^{\text{II}}(\text{CO})_2(\text{ISQ}^{\text{Dipp}})_2]$                                       | -1.15(9), -1.16(8)   | S1        |
| LUSKIU  | $[\text{Re}^{\text{V}}\text{O}(\text{AP}^{\text{Ph}})_2]^-$                                              | -2.13(6), -2.09(7)   | S2        |
| LUSKOA  | $[\text{Re}^{\text{VII}}\text{O}_2(\text{AP}^{\text{Ph}})_2]^-$                                          | -1.82(12), -1.81(9)  | S2        |
| IBUNAW  | $[\text{Re}^{\text{VI}}\text{O}(\text{AP}^{\text{Ph}})(\text{ISQ}^{\text{Ph}})\text{Cl}]$                | -1.96(8), -0.93(7)   | S3        |
| IBUMUP  | $[\text{Re}^{\text{VI}}\text{O}(\text{AP}^{\text{Ph}})(\text{ISQ}^{\text{Ph}})(\text{OC}_6\text{Cl}_5)]$ | -1.87(12), -0.98(11) | S3        |
| IBUNIE  | $[\text{Re}(\text{L}^{\text{Ph}})_2\text{Cl}_2]$                                                         | -1.25(9), -1.22(8)   | S3        |

## References

- S1. Abakumov, G. A., Poddel'sky, A. I., Bubnov, M. P., Fukin, G. K., Abakumova, L. G., Ikorskii, V. N., Cherkasov, V. K. Manganese(III) and rhenium(II) complexes with bulky 4,6-di-tert-butyl-N-(2,6-di-iso-propylphenyl)-o-iminobenzoquinonato ligands via carbonyls of corresponding metals. *Inorg. Chim. Acta*, **2005**, 358, 3829–3840.
- S2. Lippert, C.A., Arnstein, S.A., Sherrill, C.D., Soper, J.D. Redox-active ligands facilitate bimetallic O<sub>2</sub> homolysis at five-coordinate oxorhenium(V) centers. *J. Am. Chem. Soc.*, **2010**, 132, 3879–3892.
- S3. Lippert, C.A., Hardcastle, K.I., Soper, J.D. Harnessing redox-active ligands for low-barrier radical addition at oxorhenium complexes. *Inorg. Chem.*, **2011**, 50, 9864–9878.
